# Supplementary material for: Synthesis and in vitro study of novel borneol derivatives as potent inhibitors of the influenza A virus
Source: PubMed Central journal article supplement — Medchemcomm. 2017 Mar 3;8(5):960–3. doi: 10.1039/c6md00657d (PMC6072209; doi:10.1039/c6md00657d), 2017-03-03
Supplement: MD-008-C6MD00657D-s001.pdf [file MD-008-C6MD00657D-s001.pdf]

**Synthesis and in vitro study of the novel borneol derivatives as potent inhibitors of influenza virus.**

A. S. Sokolova<sup>a,b\*</sup>, O. I. Yarovaya<sup>a,b</sup>, M. D. Semenova<sup>a</sup>, A. A. Shtro<sup>c</sup>, Ya. R. Orshanskaya<sup>c</sup>, V. V. Zarubaev<sup>c</sup>, N. F. Salakhutdinov<sup>a</sup>

*<sup>a</sup>Novosibirsk Institute of Organic Chemistry, Siberian Branch of the Russian Academy of Sciences, Lavrentjev Avenue 9, 630090, Novosibirsk, Russia*

*<sup>b</sup>Novosibirsk State University, Pirogova St. 2, 630090, Novosibirsk, Russia*

*<sup>c</sup>Department of Chemotherapy, Influenza Research Institute, 15/17 Prof. Popova St., 197376 St. Petersburg, Russia*

Corresponding Author: \* Dr. A. S. Sokolova, PhD, e-mail: [asokolova@nioch.nsc.ru](mailto:asokolova@nioch.nsc.ru)

## 1. Experimental section

### 1.1 General

Reagents and solvents were purchased from commercial suppliers and used as received. Dry solvents were obtained according to the standard procedures. Optical rotation: PolAAR 3005 spectrometer; CHCl<sub>3</sub> soln. <sup>1</sup>H and <sup>13</sup>C NMR spectra were recorded with a Bruker AV-400 (<sup>1</sup>H: 400.13 MHz, <sup>13</sup>C: 100.78 MHz), DRX-500 (<sup>1</sup>H: 500.13 MHz, <sup>13</sup>C: 125.76 MHz) and AV-600 (<sup>1</sup>H: 600.30 MHz, <sup>13</sup>C: 150.95 MHz) in CDCl<sub>3</sub>; chemical shifts  $\delta$  in ppm relative to residual [ $\delta(\underline{\text{CHCl}}_3)$  7.24,  $\delta(\underline{\text{CDCl}}_3)$  76.90. HR-MS: DFS Thermo Scientific spectrometer in full scan mode (15–500 *m/z*, 70 eV electron impact ionization, direct sample administration) and Agilent 7200 Quadrupole Time-of-Flight GC/MS system. Spectral and analytical investigations were carried out at the Chemical Service Centre of the Siberian Branch of the Russian Academy of Sciences. The purity of the target compounds was determined by gas chromatography methods. All of the target compounds reported in this paper have a purity of no less than 95%. Column chromatography (CC) was performed on silica gel (60–200  $\mu$ m, Macherey-Nagel). Numeration of atoms in the compounds is given for assigning the signals in the NMR spectra and does not coincide with that for the names according to the nomenclature of compounds (see [Supplementary data](#)). Specific rotation is expressed as (deg ml) (g dm)<sup>-1</sup>; concentration is expressed as (g) (100 ml)<sup>-1</sup>.

### 1.2 Synthesis of (1S,2R,4S)-1,7,7-trimethylbicyclo[2.2.1]heptan-2-yl 2-chloroacetate (2)

To the mixture of (–)-borneol (0.03 mol) and Et<sub>3</sub>N (0.03 mol) in 20 ml dry CH<sub>2</sub>Cl<sub>2</sub> at 15–18 °C in an Ar atmosphere was added chloroacetyl chloride (0.05 mol), and the mixture was stirred at 23–25 °C for 12 h. The organic layers were washed with brine and extracted with CH<sub>2</sub>Cl<sub>2</sub>. The combined organic phase was dried over anhydrous Na<sub>2</sub>SO<sub>4</sub> and the solvent was removed. The crude product was purified by vacuum distillation (bp 105 °C at 5 mm Hg). Yield: 65%, colourless oil. **<sup>1</sup>H NMR ( $\delta$ , ppm, J/Hz):** 0.81 (3H, s, Me-9), 0.85 (3H, s, Me-10), 0.88 (3H, s, Me-8), 0.98 (1H, dd, <sup>2</sup>J=13.7, J<sub>2endo,1exo</sub>=3.5, H-2endo), 1.17-1.33 (2H, m, H-4endo, H-5exo), 1.67 (1H, dd, J<sub>3,2exo</sub>=J<sub>3,4exo</sub>=4.6, H-3), 1.69-1.79 (1H, m, H-4exo), 1.90 (1H, ddd, <sup>2</sup>J=12.9, J<sub>5endo,4endo</sub>=9.3, J<sub>5endo,4exo</sub>=4.4, H-5endo), 2.30-2.40 (1H, m, H-2exo), 4.03 (2H, s, H-12), 4.94 (1H, ddd, J<sub>1exo,2exo</sub>=10.0, J<sub>1exo,2endo</sub>=3.5, J<sub>1exo,5exo</sub>=2.2, H-1exo). **<sup>13</sup>C NMR ( $\delta$ , ppm):** 167.30 s (C-11), 81.98 d (C-1), 48.86 s (C-6), 47.81 s (C-7), 44.75 d (C-3), 41.11 d (C-12), 36.50 t (C-2), 27.82 t (C-4), 26.82 t (C-5), 19.57 q (Me-9), 18.69 q (Me-10), 13.32 q (Me-8). This compound was previously obtained.<sup>1</sup> Spectral data agree with those specified in the literature.

### 1.3 Synthesis of (1S,2R,4S)-1,7,7-trimethylbicyclo[2.2.1]heptan-2-yl 3-chloropropanoate (3)

To the solution of 3-chloropropanoic acid in dry CH<sub>2</sub>Cl<sub>2</sub>, excess oxalyl chloride and N,N-dimethylformamide (one drop) were added. The mixture was stirred at room temperature for 4 h in an Ar atmosphere. The excess oxalyl chloride was removed on a rotary evaporator. The resulting chloroanhydride of 3-chloropropanoic acid was used in a further reaction immediately.

To the solution of (-)-borneol (30 mmol) in CH<sub>2</sub>Cl<sub>2</sub> was added the chloroanhydride (30 mmol) in CH<sub>2</sub>Cl<sub>2</sub> (5 ml) and Et<sub>3</sub>N (30 mmol) at 0–5 °C, and the mixture was stirred at room temperature for 24 h in an atmosphere of Ar. The resulting precipitate was filtrated; the filtrate was washed with brine and extracted with CH<sub>2</sub>Cl<sub>2</sub>. The combined organic phase was dried over anhydrous Na<sub>2</sub>SO<sub>4</sub> and the solvent was removed. The crude product was purified by flash CC (silica gel, eluent: hexane–ethyl acetate). Yield: 59%, yellow oil. <sup>1</sup>H NMR (δ, ppm, J/Hz): 0.80 (3H, s, Me-9), 0.84 (3H, s, Me-10), 0.87 (3H, s, Me-8), 0.97 (1H, dd, <sup>2</sup>J=13.7, J<sub>2endo, 1exo</sub>=3.5, H-2endo), 1.16-1.33 (2H, m, H-4endo, H-5exo), 1.65 (1H, dd, J<sub>3,2exo</sub>=J<sub>3,4exo</sub>=4.6, H-3), 1.67-1.77 (1H, m, H-4exo), 1.89 (1H, ddd, <sup>2</sup>J=12.9, J<sub>5endo, 4endo</sub>=9.3, J<sub>5endo, 4exo</sub>=4.4, H-5endo), 2.33 (1H, m, H-2exo), 2.77 (2H, t, J=6.6, H-12), 3.74 (2H, t, J=6.6, H-13), 4.91 (1H, ddd, J<sub>1exo, 2exo</sub>=10.0, J<sub>1exo, 2endo</sub>=3.5, J<sub>1exo, 5exo</sub>=2.2, H-1exo). <sup>13</sup>C NMR (δ, ppm): 170.40 s (C-11), 80.50 d (C-1), 48.69 s (C-6), 47.69 s (C-7), 44.71 d (C-3), 39.18 d (C-13), 37.80 d (C-12), 36.54 t (C-2), 27.85 t (C-4), 26.97 t (C-5), 19.55 q (Me-9), 18.69 q (Me-10), 13.34 q (Me-8). [α]<sub>D</sub><sup>27</sup> = -36.2 (CHCl<sub>3</sub>, c=0.7). HRMS: calcd for C<sub>13</sub>H<sub>21</sub>O<sub>2</sub>Cl: 244.1222 found: 244.1225.

### 1.4 General synthetic procedure for compounds 4–21

A mixture of 1,7,7-trimethylbicyclo[2.2.1]heptan-2-yl 2-chloroacetate (2) or 1,7,7-trimethylbicyclo[2.2.1]heptan-2-yl 3-chloropropanoate (3) (2 mmol), the corresponding amine (2.2 mmol), Et<sub>3</sub>N (2.2 mmol) and 15 ml MeOH were stirred at room temperature for 24 h. After completion, the mixture was concentrated in a vacuum. Brine and ethyl acetate were added to the residue, and then the mixture was extracted twice with ethyl acetate. The combined organic phase was dried over Na<sub>2</sub>SO<sub>4</sub> and the solvent was removed in vacuo. The crude product was purified by silica gel CC (eluent: hexane–ethyl acetate).

#### (1S,2R,4S)-1,7,7-trimethylbicyclo[2.2.1]heptan-2-yl 2-(pyrrolidin-1-yl)acetate (4)

Yield: 82%, yellow oil. <sup>1</sup>H NMR (δ, ppm, J/Hz): 0.79 (3H, s, Me-9), 0.83 (3H, s, Me-10), 0.87 (3H, s, Me-8), 0.95 (1H, m, H-2endo), 1.15-1.30 (2H, m, H-4endo, H-5exo), 1.64 (1H, m, H-3), 1.64-1.76 (1H, m, H-4exo), 1.79 (4H, m, H-14, H-15), 1.85-1.95 (1H, m, H-5endo), 2.28-2.37 (1H, m, H-2exo), 2.60-2.67 (4H, m, 2H-13, 2H-16), 3.33 (2H, s, H-12), 4.92 (1H, ddd, J<sub>1exo, 2exo</sub>=10.0, J<sub>1exo, 2endo</sub>=3.5, J<sub>1exo, 5exo</sub>=2.2, H-1exo). <sup>13</sup>C NMR (δ, ppm): 171.00 s (C-11), 79.97 d (C-1), 56.54 t (C-12), 53.57 t (C-13, S-16), 48.64 s (C-6), 47.72 s (C-7), 44.65 d (C-3),

36.60 t (C-2), 27.99 t (C-4), 27.01 t (C-5), 23.68 t (C-14, C-15), 19.68 q (Me-9), 18.66 q (Me-10), 13.33 q (Me-8).  $[\alpha]_D^{25} = -21.0$  (CHCl<sub>3</sub>, c=1.02). HRMS: calcd for C<sub>16</sub>H<sub>27</sub>NO<sub>2</sub>: **265.2036** found: **265.2038**.

**(1S,2R,4S)-1,7,7-trimethylbicyclo[2.2.1]heptan-2-yl 2-(piperidin-1-yl)acetate (5)**

Yield: 80%, pale yellow oil. <sup>1</sup>H NMR (δ, ppm, J/Hz): 0.80 (3H, s, Me-10), 0.84 (3H, s, Me-8), 0.88 (3H, s, Me-9), 0.95 (1H, dd, <sup>2</sup>J=13.7, J<sub>2endo, 1exo</sub>=3.5, H-2endo), 1.14-1.31 (2H, m, H-4endo, H-5exo), 1.36-1.45 (2H, m, H-15), 1.54-1.62 (4H, m, 2H-14, 2H-16), 1.64 (1H, dd, J<sub>3,2exo</sub>=J<sub>3,4exo</sub>=4.6, H-3), 1.66-1.76 (1H, m, H-4exo), 1.89 (1H, ddd, <sup>2</sup>J=12.9, J<sub>5endo,4endo</sub>=9.3, J<sub>5endo,4exo</sub>=4.4, H-5endo), 2.33 (1H, m, H-2exo), 2.46-2.56 (4H, br. s, 2H-13, 2H-17), 3.18 (2H, s, H-12), 4.90 (1H, ddd, J<sub>1exo, 2exo</sub>=10.0, J<sub>1exo, 2endo</sub>=3.5, J<sub>1exo, 5exo</sub>=2.2, H-1exo). <sup>13</sup>C NMR (δ, ppm): 170.68 s (C-11), 79.87 d (C-1), 59.98 t (S-12), 53.81 t (C-13, C-17), 48.55 s (C-6), 47.59 s (C-7), 44.65 d (C-3), 36.60 t (C-2), 27.81 t (C-4), 26.93 t (C-5), 25.62 t (C-14, C-16), 23.68 t (C-15), 19.50 q (Me-9), 18.63 q (Me-10), 13.35 q (Me-8). HRMS: calcd for C<sub>17</sub>H<sub>29</sub>O<sub>2</sub>N: **279.2193** found: **279.2196**.

**(1S,2R,4S)-1,7,7-trimethylbicyclo[2.2.1]heptan-2-yl 2-(4-methylpiperidin-1-yl)acetate (6)**

Yield: 85%, pale yellow oil; <sup>1</sup>H NMR (δ, ppm, J/Hz): 0.77 (3H, s, Me-10), 0.81 (3H, s, Me-8), 0.84 (3H, s, Me-9), 0.86 (3H, d, J=5.7, Me-16), 0.92 (1H, dd, <sup>2</sup>J=13.7, J<sub>2endo, 1exo</sub>=3.5, H-2endo), 1.12-1.32 (5H, m, H-4endo, H-5exo, H-14a, H-15, H-17a), 1.52-1.59 (2H, m, H-14e, H-17e), 1.62 (1H, m, J<sub>3,2exo</sub>=J<sub>3,4exo</sub>=4.6, H-3), 1.63-1.74 (1H, m, H-4exo), 1.86 (1H, ddd, <sup>2</sup>J=12.9, J<sub>5endo,4endo</sub>=9.3, J<sub>5endo,4exo</sub>=4.4, H-5endo), 2.08-2.18 (2H, m, H-13a, H-18a), 2.30 (1H, m, H-2exo), 2.78-2.91 (2H, m, H-13e, H-18e), 3.17 (2H, s, H-12), 4.88 (1H, ddd, J<sub>1exo,2exo</sub>=10.0, J<sub>1exo,2endo</sub>=3.5, J<sub>1exo, 5exo</sub>=2.2, H-1exo). <sup>13</sup>C NMR (δ, ppm): 170.80 s (C-11), 79.76 d (C-1), 59.71 t (C-12), 53.29 and 53.27 t (C-13, C-18), 48.51 s (C-6), 47.56 s (C-7), 44.62 d (C-3), 36.58 t (C-2), 33.99 t (C-14, C-17), 30.11 d (C-16), 27.79 t (C-4), 26.91 t (C-5), 21.67 q (Me-16), 19.49 q (Me-9), 18.62 q (Me-10), 13.34 q (Me-8).  $[\alpha]_D^{26} = -32.4$  (CHCl<sub>3</sub>, c=0.92). HRMS: calcd for C<sub>18</sub>H<sub>31</sub>NO<sub>2</sub>: **293.2349**; found: **293.2150**.

**(1S,2R,4S)-1,7,7-trimethylbicyclo[2.2.1]heptan-2-yl 2-morpholinoacetate (7)**

Yield: 62%, yellow oil. <sup>1</sup>H NMR (δ, ppm, J/Hz): 0.79 (3H, s, Me-9), 0.84 (3H, s, Me-10), 0.87 (3H, s, Me-8), 0.93 (1H, dd, <sup>2</sup>J=13.7, J<sub>2endo, 1exo</sub>=3.5, H-2endo), 1.13-1.31 (2H, m, H-4endo, H-5exo), 1.64 (1H, dd, J<sub>3, 2exo</sub>=J<sub>3, 4exo</sub>=4.6, H-3), 1.66-1.76 (1H, m, H-4exo), 1.86 (1H, ddd, <sup>2</sup>J=12.9, J<sub>5endo, 4endo</sub>=9.3, J<sub>5endo, 4exo</sub>=4.4, H-5endo), 2.33 (1H, m, H-2exo), 2.55-2.62 (4H, m, 2H-13, 2H-16), 3.21 (2H, s, H-12), 3.69-3.75 (4H, m, 2H-14, 2H-15), 4.91 (1H, ddd, J<sub>1exo,2exo</sub>=10.0, J<sub>1exo, 2endo</sub>=3.5, J<sub>1exo, 5exo</sub>=2.2, H-1exo). <sup>13</sup>C NMR (δ, ppm): 170.25 s (C-11), 70.10 d (C-1), 66.64 t (C-14, C-15), 59.53 t (C-12), 53.04 t (C-13, C-16), 48.56 s (C-6), 47.61 s (C-7), 44.62 d (C-3), 36.58 t (C-2), 27.80 t (C-4), 26.91 t (C-5), 19.49 q (Me-9), 18.62 q (Me-10), 13.35

q (Me-8).  $[\alpha]_D^{26} = -30.6$  (CHCl<sub>3</sub>, c=1.2). HRMS: calcd for C<sub>16</sub>H<sub>27</sub>O<sub>3</sub>N: **281.1986**; found: **281.1991**.

**(1S,2R,4S)-1,7,7-trimethylbicyclo[2.2.1]heptan-2-yl 2-(4-methylpiperazin-1-yl)acetate (8)**

Yield: 60%, pale yellow oil. **<sup>1</sup>H NMR (δ, ppm, J/Hz):** 0.77 (3H, s, Me-10), 0.82 (3H, s, Me-8), 0.85 (3H, s, Me-9), 0.94 (1H, dd, <sup>2</sup>J=13.7, J<sub>2endo, 1exo</sub>=3.5, H-2endo), 1.12-1.29 (2H, m, H-4endo, H-5exo), 1.64 (1H, dd, J<sub>3, 2exo</sub>=J<sub>3, 4exo</sub>=4.6, H-3), 1.64-1.75 (1H, m, H-4exo), 1.86 (1H, ddd, <sup>2</sup>J=12.9, J<sub>5endo, 4endo</sub>=9.3, J<sub>5endo, 4exo</sub>=4.4, H-5endo), 2.24 (3H, s, Me-15), 2.26-2.36 (1H, m, H-2exo), 2.36-2.66 (8H, br. s., 2H-13, 2H-14, 2H-16, 2H-17), 3.17 (2H, s, H-12), 4.89 (1H, ddd, J<sub>1exo, 2exo</sub>=10.0, J<sub>1exo, 2endo</sub>=3.5, J<sub>1exo, 5exo</sub>=2.2, H-1exo). **<sup>13</sup>C NMR (δ, ppm):** 170.45 s (C-11), 80.07 d (C-1), 59.32 t (C-12), 54.73 t (C-13, C-17), 52.82 (C-14, C-16), 48.63 s (C-6), 47.80 s (C-7), 45.86 k (Me-15), 44.70 d (C-3), 36.63 t (C-2), 27.87 t (C-4), 26.95 t (C-5), 19.56 q (Me-9), 18.69 q (Me-10), 13.41 q (Me-8).  $[\alpha]_D^{25} = -31.9$  (CHCl<sub>3</sub>, c=1.18). HRMS: calcd for C<sub>17</sub>H<sub>30</sub>O<sub>2</sub>N<sub>2</sub>: **294.2302**; found: **294.2303**.

**(1S,2R,4S)-1,7,7-trimethylbicyclo[2.2.1]heptan-2-yl 2-(4-ethylpiperazin-1-yl)acetate (9)**

Yield: 63%, yellow oil. **<sup>1</sup>H NMR (δ, ppm, J/Hz):** 0.77 (3H, s, Me-10), 0.82 (3H, s, Me-8), 0.85 (3H, s, Me-9), 0.94 (1H, dd, <sup>2</sup>J=13.7, J<sub>2endo, 1exo</sub>=3.5, H-2endo), 1.12-1.29 (2H, m, H-4endo, H-5exo), 1.64 (1H, dd, J<sub>3, 2exo</sub>=J<sub>3, 4exo</sub>=4.6, H-3), 1.64-1.75 (1H, m, H-4exo), 1.86 (1H, ddd, <sup>2</sup>J=12.9, J<sub>5endo, 4endo</sub>=9.3, J<sub>5endo, 4exo</sub>=4.4, H-5endo), 2.24 (3H, s, Me-15), 2.26-2.36 (1H, m, H-2exo), 2.36-2.66 (8H, br s., 2H-13, 2H-14, 2H-16, 2H-17), 3.17 (2H, s, H-12), 4.89 (1H, ddd, J<sub>1exo, 2exo</sub>=10.0, J<sub>1exo, 2endo</sub>=3.5, J<sub>1exo, 5exo</sub>=2.2, H-1exo). **<sup>13</sup>C NMR (δ, ppm):** 170.45 s (C-11), 80.07 d (C-1), 59.32 t (C-12), 54.73 t (C-13, C-17), 52.82 (C-14, C-16), 48.63 s (C-6), 47.80 s (C-7), 45.86 k (Me-15), 44.70 d (C-3), 36.63 t (C-2), 27.87 t (C-4), 26.95 t (C-5), 19.56 q (Me-9), 18.69 q (Me-10), 13.41 q (Me-8).  $[\alpha]_D^{28} = -21.4$  (CHCl<sub>3</sub>, c=1.02). HRMS: calcd for C<sub>18</sub>H<sub>32</sub>O<sub>2</sub>N<sub>2</sub>: **308.2458**; found: **308.2456**.

**(1S,2R,4S)-1,7,7-trimethylbicyclo[2.2.1]heptan-2-yl 2-(piperazin-1-yl)acetate (10)**

Yield: 65%, pale yellow oil. **<sup>1</sup>H NMR (δ, ppm, J/Hz):** 0.77 (3H, s, Me-10), 0.82 (3H, s, Me-8), 0.85 (3H, s, Me-9), 0.93 (1H, dd, <sup>2</sup>J=13.7, J<sub>2endo, 1exo</sub>=3.5, H-2endo), 1.04 (3H, t, J=7.24, Me-16), 1.13-1.30 (2H, m, H-4endo, H-5exo), 1.62 (1H, dd, J<sub>3, 2exo</sub>=J<sub>3, 4exo</sub>=4.6, H-3), 1.65-1.74 (1H, m, H-4exo), 1.86 (1H, ddd, <sup>2</sup>J=12.9, J<sub>5endo, 4endo</sub>=9.3, J<sub>5endo, 4exo</sub>=4.4, H-5endo), 2.31 (1H, m, H-2exo), 2.39 (2H, t, J=7.2, H-15), 2.42-2.68 (8H, br. s., 2H-13, 2H-14, 2H-17, 2H-18), 3.17 (2H, s, H-12), 4.89 (1H, ddd, J<sub>1exo, 2exo</sub>=10.0, J<sub>1exo, 2endo</sub>=3.5, J<sub>1exo, 5exo</sub>=2.2, H-1exo). **<sup>13</sup>C NMR (δ, ppm):** 170.40 s (C-11), 80.01 d (C-1), 59.36 t (C-12), 52.87 t (C-13, C-18), 52.36 (C-14, C-17),

52.04 t (C-15), 48.59 s (C-6), 47.67 s (C-7), 44.63 d (C-3), 36.54 t (C-2), 27.78 t (C-4), 26.86 t (C-5), 19.49 q (Me-9), 18.65 q (Me-10), 13.32 q (Me-8), 11.81 q (Me-16).  $[\alpha]_D^{26} = -31.5$  (CHCl<sub>3</sub>, c=0.82). HRMS: calcd for C<sub>16</sub>H<sub>28</sub>N<sub>2</sub>O<sub>2</sub>: **280.2145**; found: **280.2142**.

**Ethyl 4-(2-oxo-2-((1S,2R,4S)-1,7,7-trimethylbicyclo[2.2.1]heptan-2-yloxy)ethyl)piperazine-1-carboxylate (11)**

Yield: 69%, yellow solid. <sup>1</sup>H NMR (δ, ppm, J/Hz): 0.77 (3H, s, Me-10), 0.82 (3H, s, Me-8), 0.85 (3H, s, Me-9), 0.92 (1H, dd, <sup>2</sup>J=13.7, J<sub>2endo, 1exo</sub>=3.5, H-2endo), 1.12-1.30 (2H, m, H-4endo, H-5exo), 1.62 (1H, dd, J<sub>3, 2exo</sub>=J<sub>3, 4exo</sub>=4.6, H-3), 1.64-1.74 (1H, m, H-4exo), 1.85 (1H, ddd, <sup>2</sup>J=12.9, J<sub>5endo, 4endo</sub>=9.3, J<sub>5endo, 4exo</sub>=4.4, H-5endo), 1.94 (1H, br. s., N-H), 2.23-2.37 (1H, m, H-2exo), 2.47-2.57 (4H, br. s., 2H-14, 2H-15), 2.84-2.94 (4H, m, 2H-13, 2H-16), 3.17 (2H, s, H-12), 4.88 (1H, ddd, J<sub>1exo, 2exo</sub>=10.0, J<sub>1exo, 2endo</sub>=3.5, J<sub>1exo, 5exo</sub>=2.2, H-1exo). <sup>13</sup>C NMR (δ, ppm): 170.51 s (C-11), 80.02 d (C-1), 59.87 t (C-12), 53.91 t (C-13, C-16), 48.62 s (C-6), 47.66 s (C-7), 45.73 t (C-14, C-15), 44.67 d (C-3), 36.64 t (C-2), 27.87 t (C-4), 26.96 t (C-5), 19.57 k (Me-9), 18.70 k (Me-10), 13.43 k (Me-8).  $[\alpha]_D^{26} = -23.7$  (CHCl<sub>3</sub>, c=1.36). HRMS: calcd for C<sub>19</sub>H<sub>32</sub>O<sub>4</sub>N<sub>2</sub>: **357.2357**; found: **357.2349**.

**(1S,2R,4S)-1,7,7-trimethylbicyclo[2.2.1]heptan-2-yl 2-(dibutylamino)acetate (12)**

Yield: 75%, pale yellow oil. <sup>1</sup>H NMR (δ, ppm, J/Hz): 0.80 (3H, s, Me-9), 0.84 (3H, s, Me-10), 0.87 (3H, s, Me-8), 0.88 (6H, t, J=7.26, Me-19, Me-20), 0.94 (1H, dd, <sup>2</sup>J=13.8, J<sub>2endo, 1exo</sub>=3.5, H-2endo), 1.15-1.34 (6H, m, H-4endo, H-5exo, 2H-17, 2H-18), 1.37-1.46 (4H, m, 2H-15, 2H-16), 1.64 (1H, m, H-3), 1.67-1.77 (1H, m, H-4exo), 1.92 (1H, m, H-5endo), 2.33 (1H, m, H-2exo), 2.51-2.58 (4H, m, 2H-13, 2H-14), 3.31 (2H, s, H-12), 4.90 (1H, ddd, J<sub>1exo, 2exo</sub>=10.0, J<sub>1exo, 2endo</sub>=3.5, J<sub>1exo, 5exo</sub>=2.2, H-1exo). <sup>13</sup>C NMR (δ, ppm): 172.00 s (C-11), 79.75 d (C-1), 54.95 t (C-12), 54.03 (C-13, C-14), 48.55 s (C-6), 47.62 s (C-7), 44.72 d (C-3), 36.73 t (C-2), 29.72 t (C-15, C-16), 27.88 t (C-4), 27.07 t (C-5), 20.40 t (C-17, C-18), 19.56 q (Me-9), 18.68 q (Me-10), 13.91 q (Me-19, Me-20), 13.38 q (Me-8).  $[\alpha]_D^{26} = -30$  (CHCl<sub>3</sub>, c=1.28). HRMS: calcd for C<sub>20</sub>H<sub>37</sub>O<sub>2</sub>N: **323.2819**; found: **323.2823**.

**(1S,2R,4S)-1,7,7-trimethylbicyclo[2.2.1]heptan-2-yl 3-(pyrrolidin-1-yl)propanoate (13)**

Yield: 78%, yellow oil. <sup>1</sup>H NMR (δ, ppm, J/Hz): 0.78 (3H, s, Me-9), 0.82 (3H, s, Me-10), 0.86 (3H, s, Me-8), 0.93 (1H, m, H-2endo), 1.13-1.30 (2H, m, H-4endo, H-5exo), 1.63 (1H, m, H-3), 1.64-1.80 (5H, m, H-4exo, H-15, H-16), 1.85-1.95 (1H, m, H-5endo), 2.23-2.37 (1H, m, H-2exo), 2.42-2.53 (6H, m, 2H-12, 2H-14, 2H-17), 2.70-2.79 (2H, m, H-13), 4.86 (1H, ddd, J<sub>1exo, 2exo</sub>=10.0, J<sub>1exo, 2endo</sub>=3.5, J<sub>1exo, 5exo</sub>=2.2, H-1exo). <sup>13</sup>C NMR (δ, ppm): 172.72 s (C-11), 79.60 d (C-1), 53.79 t (C-14, C-17), 51.36 t (C-13), 48.60 s (C-6), 47.61 s (C-7), 44.71 d (C-3), 36.53 t (C-2), 34.51 t (C-12), 27.87 t (C-4), 26.96 t (C-5), 23.33 t (C-15, C-16), 19.54 q (Me-9), 18.68 q

(Me-10), 13.29 q (Me-8).  $[\alpha]_D^{25} = -42.2$  (CHCl<sub>3</sub>, c=0.7). HRMS: calcd for C<sub>17</sub>H<sub>29</sub>NO<sub>2</sub>: **279.2193**; found: **279.2192**.

**(1S,2R,4S)-1,7,7-trimethylbicyclo[2.2.1]heptan-2-yl 3-(piperidin-1-yl)propanoate (14)**

Yield: 74%, pale yellow oil. <sup>1</sup>H NMR (δ, ppm, J/Hz): 0.79 (3H, s, Me-10), 0.83 (3H, s, Me-8), 0.86 (3H, s, Me-9), 0.94 (1H, dd, <sup>2</sup>J=13.7, J<sub>2endo, 1exo</sub>=3.5, H-2endo), 1.15-1.30 (2H, m, H-4endo, H-5exo), 1.33-1.43 (2H, m, H-16), 1.49-1.57 (4H, m, 2H-15, 2H-17), 1.63 (1H, dd, J<sub>3,2exo</sub>=J<sub>3,4exo</sub>=4.6, H-3), 1.65-1.76 (1H, m, H-4exo), 1.85-1.94 (1H, ddd, <sup>2</sup>J=12.9, J<sub>5endo, 4endo</sub>=9.3, J<sub>5endo, 4exo</sub>=4.4, H-5endo), 2.30 (1H, m, H-2exo), 2.31-2.42 (4H, br. s, 2H-14, 2H-18), 2.43-2.53 (2H, m, H-12), 2.57-2.66 (2H, m, H-13), 4.86 (1H, ddd, J<sub>1exo, 2endo</sub>=10.0, J<sub>1exo, 2endo</sub>=3.5, J<sub>1exo, 5exo</sub>=2.2, H-1exo). <sup>13</sup>C NMR (δ, ppm): 172.62 s (C-11), 79.28 d (C-1), 54.02 t (C-13), 53.78 t (C-14, C-18), 48.32 s (C-6), 47.32 s (C-7), 44.73 d (C-3), 36.21 t (C-2), 32.33 t (C-12), 27.57 t (C-4), 26.66 t (C-5), 25.52 t (C-15, C-17), 23.87 t (C-16), 19.23 q (Me-9), 18.38 q (Me-10), 13.01 q (Me-8).  $[\alpha]_D^{24} = -31.5$  (CHCl<sub>3</sub>, c=0.8). HRMS: calcd for C<sub>17</sub>H<sub>29</sub>NO<sub>2</sub>: **293.2349**; found: **293.2356**.

**(1S,2R,4S)-1,7,7-trimethylbicyclo[2.2.1]heptan-2-yl 3-(4-methylpiperidin-1-yl)propanoate (15)**

Yield: 77%, colorless oil. <sup>1</sup>H NMR (δ, ppm, J/Hz): 0.79 (3H, s, Me-10), 0.84 (3H, s, Me-8), 0.87 (3H, s, Me-9), 0.89 (3H, d, J=12.1, Me-17), 0.94 (1H, dd, <sup>2</sup>J=13.7, J<sub>2endo, 1exo</sub>=3.5, H-2endo), 1.15-1.37 (5H, m, H-4endo, H-5exo, H-15a, H-16, H-18a), 1.53-1.61 (2H, m, H-15e, H-18e), 1.63 (1H, dd, J<sub>3, 2exo</sub>=J<sub>3, 4exo</sub>=4.6, H-3), 1.65-1.76 (1H, m, H-4exo), 1.84-1.97 (3H, m, H-5endo, H-14a, H-19a), 2.30 (1H, m, H-2exo), 2.45-2.52 (2H, m, H-12), 2.60-2.68 (2H, m, H-13), 2.79-2.86 (2H, m, H-14e, H-19e), 4.86 (1H, ddd, J<sub>1exo, 2exo</sub>=10.0, J<sub>1exo, 2endo</sub>=3.5, J<sub>1exo, 5exo</sub>=2.2, H-1exo). <sup>13</sup>C NMR (δ, ppm): 172.61 s (C-11), 79.28 d (C-1), 53.67 t (C-13), 53.26 and 53.22 t (C-14, C-19), 48.32 s (C-6), 47.32 s (C-7), 44.43 d (C-3), 36.22 t (C-2), 33.89 and 33.87 t (C-15, C-18), 32.49 t (C-12), 30.25 d (C-16), 27.57 t (C-4), 26.67 t (C-5), 21.42 q (Me-17), 19.24 q (Me-9), 18.38 q (Me-10), 13.01 q (Me-8).  $[\alpha]_D^{24} = -30.6$  (CHCl<sub>3</sub>, c=0.68). HRMS: calcd for C<sub>19</sub>H<sub>33</sub>O<sub>2</sub>N: **307.2506**; found: **307.2503**.

**(1S,2R,4S)-1,7,7-trimethylbicyclo[2.2.1]heptan-2-yl 3-morpholinopropanoate (16)**

Yield: 58%, pale yellow oil. <sup>1</sup>H NMR (δ, ppm, J/Hz): 0.80 (3H, s, Me-9), 0.83 (3H, s, Me-10), 0.87 (3H, s, Me-8), 0.94 (1H, dd, <sup>2</sup>J=13.7, J<sub>2endo, 1exo</sub>=3.5, H-2endo), 1.13-1.30 (2H, m, H-4endo, H-5exo), 1.65 (1H, dd, J<sub>3, 2exo</sub>=J<sub>3, 4exo</sub>=4.6, H-3), 1.71 (1H, ddddd, <sup>2</sup>J=J<sub>4exo, 5exo</sub>=12.0, J<sub>4exo, 3</sub>=4.6, J<sub>4exo, 5endo</sub>=4.4, J<sub>4exo, 2exo</sub>=3.3, H-4exo), 1.88 (1H, ddd, <sup>2</sup>J=12.9, J<sub>5endo, 4endo</sub>=9.3, J<sub>5endo, 4exo</sub>=4.4, H-5endo), 2.31 (1H, m, H-2exo), 2.38-2.45 (4H, m, 2H-14, 2H-17), 2.45-2.49 (2H, m, H-12), 2.62-

2.68 (2H, m, H-13), 3.60-3.73 (4H, m, 2H-15, 2H-16), 4.87 (1H, ddd,  $J_{1\text{exo},2\text{exo}}=10.0$ ,  $J_{1\text{exo},2\text{endo}}=3.5$ ,  $J_{1\text{exo},5\text{exo}}=2.2$ , H-1exo).  $^{13}\text{C}$  NMR ( $\delta$ , ppm): 172.56 s (C-11), 79.76 d (C-1), 66.83 t (C-15, C-16), 54.06 t (C-13), 53.26 t (C-14, C-17), 48.69 s (C-6), 47.68 s (C-7), 44.75 d (C-3), 36.55 t (C-2), 32.50 t (C-12), 27.94 t (C-4), 27.02 t (C-5), 19.57 q (Me-9), 18.71 q (Me-10), 13.37 q (Me-8).  $[\alpha]_D^{28}=-34$  ( $\text{CHCl}_3$ ,  $c=0.7$ ). HRMS: calcd for  $\text{C}_{17}\text{H}_{29}\text{O}_3\text{N}$ : **295.2142**; found: **295.2138**.

**(1S,2R,4S)-1,7,7-trimethylbicyclo[2.2.1]heptan-2-yl 3-(piperazin-1-yl)propanoate (17)**

Yield: 52%, pale yellow oil.  $^1\text{H}$  NMR ( $\delta$ , ppm, J/Hz): 0.79 (3H, s, Me-10), 0.83 (3H, s, Me-8), 0.86 (3H, s, Me-9), 0.94 (1H, dd,  $^2J=13.7$ ,  $J_{2\text{endo},1\text{exo}}=3.5$ , H-2endo), 1.13-1.30 (2H, m, H-4endo, H-5exo), 1.63 (1H, dd,  $J_{3,2\text{exo}}=J_{3,4\text{exo}}=4.6$ , H-3), 1.66-1.75 (1H, m, H-4exo), 1.85-1.93 (1H, ddd,  $^2J=12.9$ ,  $J_{5\text{endo},4\text{endo}}=9.3$ ,  $J_{5\text{endo},4\text{exo}}=4.4$ , H-5endo), 2.31 (1H, m, H-2exo), 2.40 (4H, br. s, 2H-15, 2H-16), 2.44-2.50 (2H, m, H-12), 2.61-2.68 (2H, m, H-13), 2.80-2.88 (4H, m, 2H-14, 2H-17) 4.86 (1H, ddd,  $J_{1\text{exo},2\text{exo}}=10.0$ ,  $J_{1\text{exo},2\text{endo}}=3.5$ ,  $J_{1\text{exo},5\text{exo}}=2.2$ , H-1exo).  $^{13}\text{C}$  NMR ( $\delta$ , ppm): 172.71 s (C-11), 79.69 d (C-1), 54.20 t (C-13), 54.03 t (C-14, C-17), 48.65 s (C-6), 47.65 s (C-7), 45.87 t (C-15, C-16), 44.73 d (C-3), 36.53 t (C-2), 32.50 t (C-12), 27.90 t (C-4), 26.99 t (C-5), 19.55 q (Me-9), 18.70 q (Me-10), 13.35 q (Me-8).  $[\alpha]_D^{28}=-23$  ( $\text{CHCl}_3$ ,  $c=0.62$ ). HRMS: calcd for  $\text{C}_{17}\text{H}_{30}\text{O}_2\text{N}_2$ : **294.2302**; found: **294.2299**.

**(1S,2R,4S)-1,7,7-trimethylbicyclo[2.2.1]heptan-2-yl 3-(4-methylpiperazin-1-yl)propanoate (18)**

Yield: 91%, pale yellow oil.  $^1\text{H}$  NMR ( $\delta$ , ppm, J/Hz): 0.78 (3H, s, Me-10), 0.82 (3H, s, Me-8), 0.85 (3H, s, Me-9), 0.93 (1H, dd,  $^2J=13.7$ ,  $J_{2\text{endo},1\text{exo}}=3.5$ , H-2endo), 1.10-1.30 (2H, m, H-4endo, H-5exo), 1.62 (1H, dd,  $J_{3,2\text{exo}}=J_{3,4\text{exo}}=4.6$ , H-3), 1.62-1.74 (1H, m, H-4exo), 1.83-1.91 (1H, ddd,  $^2J=12.9$ ,  $J_{5\text{endo},4\text{endo}}=9.3$ ,  $J_{5\text{endo},4\text{exo}}=4.4$ , H-5endo), 2.22 (3H, s, Me-16), 2.29 (1H, m, H-2exo), 2.43-2.47 (2H, m, H-12), 2.32-2.57 (8H, br. s., 2H-14, 2H-15, 2H-17, 2H-18), 2.62-2.67 (2H, m, H-13), 4.85 (1H, ddd,  $J_{1\text{exo},2\text{exo}}=10.0$ ,  $J_{1\text{exo},2\text{endo}}=3.5$ ,  $J_{1\text{exo},5\text{exo}}=2.2$ , H-1exo).  $^{13}\text{C}$  NMR ( $\delta$ , ppm): 172.61 s (C-11), 79.64 d (C-1), 54.94 t (C-14, C-18), 53.56 t (C-13), 52.71 (C-15, C-17), 48.62 s (C-6), 47.62 s (C-7), 45.90 k (Me-16), 44.71 d (C-3), 36.50 t (C-2), 32.66 t (C-12), 27.88 t (C-4), 26.97 t (C-5), 19.54 q (Me-9), 18.68 q (Me-10), 13.35 q (Me-8).  $[\alpha]_D^{25}=-30.6$  ( $\text{CHCl}_3$ ,  $c=0.68$ ). HRMS: calcd for  $\text{C}_{18}\text{H}_{32}\text{O}_2\text{N}_2$ : **308.2458**; found: **308.2459**.

**(1S,2R,4S)-1,7,7-trimethylbicyclo[2.2.1]heptan-2-yl 3-(4-ethylpiperazin-1-yl)propanoate (19)**

Yield: 68%, pale yellow oil.  $^1\text{H}$  NMR ( $\delta$ , ppm, J/Hz): 0.79 (3H, s, Me-10), 0.82 (3H, s, Me-8), 0.86 (3H, s, Me-9), 0.94 (1H, dd,  $^2J=13.7$ ,  $J_{2\text{endo},1\text{exo}}=3.5$ , H-2endo), 1.03 (3H, t,  $J=7.24$ ,



Me-17), 1.13-1.30 (2H, m, H-4endo, H-5exo), 1.63 (1H, dd,  $J_{3,2\text{exo}}=J_{3,4\text{exo}}=4.6$ , H-3), 1.64-1.75 (1H, m, H-4exo), 1.83-1.93 (1H, ddd,  $^2J=12.9$ ,  $J_{5\text{endo},4\text{endo}}=9.3$ ,  $J_{5\text{endo},4\text{exo}}=4.4$ , H-5endo), 2.30 (1H, m, H-2exo), 2.35 (2H, t,  $J=7.2$ , H-16), 2.44-2.50 (2H, m, H-12), 2.32-2.63 (8H, br. s., 2H-14, 2H-15, 2H-18, 2H-19), 2.63-2.69 (2H, m, H-13), 4.86 (1H, ddd,  $J_{1\text{exo},2\text{exo}}=10.0$ ,  $J_{1\text{exo},2\text{endo}}=3.5$ ,  $J_{1\text{exo},5\text{exo}}=2.2$ , H-1exo).  $^{13}\text{C NMR}$  ( $\delta$ , ppm): 172.63 s (C-11), 79.64 d (C-1), 53.57 t (C-13), 52.72 t (C-14, C-19), 52.61 (C-15, C-18), 52.11 t (C-16), 48.62 s (C-6), 47.61 s (C-7), 44.71 d (C-3), 36.50 t (C-2), 32.65 t (C-12), 27.87 t (C-4), 26.96 t (C-5), 19.53 k (Me-9), 18.66 q (Me-10). 13.32 q (Me-8), 11.81 q (Me-17).  $[\alpha]_D^{25}=-25.5$  ( $\text{CHCl}_3$ ,  $c=0.94$ ). HRMS: calcd for  $\text{C}_{19}\text{H}_{34}\text{O}_2\text{N}_2$ : **322.2615**; found: **322.2612**.

**Ethyl 4-(3-oxo-3-((1S,2R,4S)-1,7,7-trimethylbicyclo[2.2.1]heptan-2-yloxy)propyl)piperazine-1-carboxylate (20)**

Yield: 67%, pale yellow oil.  $^1\text{H NMR}$  ( $\delta$ , ppm, J/Hz): 0.80 (3H, s, Me-10), 0.84 (3H, s, Me-8), 0.87 (3H, s, Me-9), 0.95 (1H, dd,  $^2J=13.7$ ,  $J_{2\text{endo},1\text{exo}}=3.5$ , H-2endo), 1.22 (3H, t,  $J=7.2$ , Me-18), 1.14-1.31 (2H, m, H-4endo, H-5exo), 1.65 (1H, dd,  $J_{3,2\text{exo}}=J_{3,4\text{exo}}=4.6$ , H-3), 1.67-1.79 (1H, m, H-4exo), 1.78-1.93 (1H, ddd,  $^2J=12.9$ ,  $J_{5\text{endo},4\text{endo}}=9.3$ ,  $J_{5\text{endo},4\text{exo}}=4.4$ , H-5endo), 2.30 (1H, m, H-2exo), 2.36-2.43 (4H, m, 2H-14, 2H-20), 2.44-2.50 (2H, m, H-12), 2.64-2.70 (2H, m, H-13), 3.35-3.50 (4H, m, 2H-15, 2H-19), 4.10 (2H, t,  $J=7.1$ , H-17), 4.88 (1H, ddd,  $J_{1\text{exo},2\text{exo}}=10.0$ ,  $J_{1\text{exo},2\text{endo}}=3.5$ ,  $J_{1\text{exo},5\text{exo}}=2.2$ , H-1exo).  $^{13}\text{C NMR}$  ( $\delta$ , ppm): 172.18 s (C-11), 155.03 c (C-16), 79.46 d (C-1), 60.86 t (C-17), 53.34 t (C-13), 52.15 t (C-15, C-19), 48.35 s (C-6), 47.34 s (C-7), 44.41 d (C-3), 43.16 (C-14, C-20), 36.21 t (C-2), 32.33 t (C-12), 27.61 t (C-4), 26.68 t (C-5), 19.23 q (Me-9), 18.37 q (Me-10). 14.21 q (Me-18), 13.04 q (Me-8).  $[\alpha]_D^{25}=-23.6$  ( $\text{CHCl}_3$ ,  $c=0.56$ ). HRMS: calcd for  $\text{C}_{20}\text{H}_{34}\text{O}_4\text{N}_2$ : **366.2513**; found: **366.2520**.

**(1S,2R,4S)-1,7,7-trimethylbicyclo[2.2.1]heptan-2-yl 3-(dibutylamino)propanoate (21)**  
Yield: 69%, yellow oil.  $^1\text{H NMR}$  ( $\delta$ , ppm, J/Hz): 0.79 (3H, s, Me-9), 0.83 (3H, s, Me-10), 0.86 (3H, s, Me-8), 0.87 (6H, t,  $J=7.2$ , Me-20, Me-21), 0.93 (1H, m, H-2endo), 1.14-1.43 (10H, m, H-4endo, H-5exo, 2H-16, 2H-17, 2H-18, 2H-19), 1.63 (1H, m, H-3), 1.65-1.75 (1H, m, H-4exo), 1.86-1.95 (1H, m, H-5endo), 2.25-2.34 (1H, m, H-2exo), 2.32-2.44 (6H, m, 2H-12, 2H-14, 2H-15), 2.72-2.79 (2H, m, H-13), 4.84 (1H, ddd,  $J_{1\text{exo},2\text{exo}}=10.0$ ,  $J_{1\text{exo},2\text{endo}}=3.5$ ,  $J_{1\text{exo},5\text{exo}}=2.2$ , H-1exo).  $^{13}\text{C NMR}$  ( $\delta$ , ppm): 173.18 s (C-11), 79.57 d (C-1), 53.45 t (C-14, S-15), 49.48 t (C-13), 48.57 s (C-6), 47.63 s (C-7), 44.74 d (C-3), 36.59 t (C-2), 32.48 t (C-12), 29.23 t (C-16, C-17), 27.88 t (C-4), 26.98 t (C-5), 20.53 t (C-18, C-19), 19.56 q (Me-9), 18.69 q (Me-10), 13.94 q (Me-20, Me-21), 13.35 q (Me-8).  $[\alpha]_D^{25}=-28.8$  ( $\text{CHCl}_3$ ,  $c=0.82$ ). HRMS: calcd for  $\text{C}_{21}\text{H}_{39}\text{O}_2\text{N}$ : **337.2975**; found: **337.2970**.

**1.5 Synthesis of derivatives based on (-)-isoborneol 23–26**

**(1S,2S,4S)-1,7,7-trimethylbicyclo[2.2.1]heptan-2-yl 2-chloroacetate (23)**

Compound **23** was prepared similarly to compound **2** and purified by flash silica gel column chromatography (hexane-ethyl acetate eluent). Yield: 87%, pale yellow oil. **<sup>1</sup>H NMR (400 MHz, CDCl<sub>3</sub>, δ, ppm, J/Hz):** 0.81 (3H, s, Me-9), 0.85 (3H, s, Me-10), 0.88 (3H, s, Me-8), 0.99 (1H, dd, <sup>2</sup>J=13.6, J<sub>2endo,1endo</sub>=3.4, H-2endo), 1.17-1.34 (2H, m, H-4endo, H-5exo), 1.65-1.78 (2H, m, H-3, H-4exo), 1.90 (1H, m, H-5endo), 2.35 (1H, m, H-2exo), 4.05 (2H, s, H-12), 4.94 (1H, m, H-1endo). **<sup>13</sup>C NMR (100 MHz, CDCl<sub>3</sub>, δ, ppm):** 167.46 s (C-11), 81.98 d (C-1), 48.81 s (C-6), 47.79 s (C-7), 44.65 d (C-3), 41.06 d (C-12), 36.38 t (C-2), 27.81 t (C-4), 26.80 t (C-5), 19.52 q (Me-9), 18.67 q (Me-10), 13.32 q (Me-8). [ $\alpha$ ]<sub>D</sub><sup>28</sup> = -37.5 (CHCl<sub>3</sub>, c=0.8). HRMS: calcd for C<sub>12</sub>H<sub>19</sub>O<sub>2</sub>Cl: 230.1068; found: 230.1066.

**(1S,2S,4S)-1,7,7-trimethylbicyclo[2.2.1]heptan-2-yl 3-chloropropanoate (24)**

Compound **24** was prepared similarly compound to **3**. Yield: 65%, colorless oil. **<sup>1</sup>H NMR (400 MHz, CDCl<sub>3</sub>, δ, ppm, J/Hz):** 0.81 (3H, s, Me-9), 0.85 (3H, s, Me-10), 0.88 (3H, s, Me-8), 0.97 (1H, dd, <sup>2</sup>J=13.9, J<sub>2endo,1endo</sub>=3.8, H-2endo), 1.17-1.33 (2H, m, H-4endo, H-5exo), 1.63-1.77 (2H, m, H-3, H-4exo), 1.90 (1H, m, H-5endo), 2.34 (1H, m, H-2exo), 2.79 (2H, t, J=6.6, H-12), 3.75 (2H, t, J=6.6, H-13), 4.92 (1H, m, H-1endo). **<sup>13</sup>C NMR (125 MHz, CDCl<sub>3</sub>, δ, ppm):** 170.36 s (C-11), 80.45 d (C-1), 48.62 s (C-6), 47.63 s (C-7), 44.63 d (C-3), 39.12 d (C-13), 37.74 d (C-12), 36.48 t (C-2), 27.79 t (C-4), 26.91 t (C-5), 19.49 q (Me-9), 18.63 q (Me-10), 13.28 q (Me-8). [ $\alpha$ ]<sub>D</sub><sup>29</sup> = -32.7 (CHCl<sub>3</sub>, c=0.4). HRMS: calcd for C<sub>13</sub>H<sub>21</sub>O<sub>2</sub>Cl: **244.1222** found: **244.1223**.

**(1S,2R,4S)-1,7,7-trimethylbicyclo[2.2.1]heptan-2-yl 2-morpholinoacetate (25)**

Compound **25** was prepared similarly to compound **7**. Yield: 67%, pale yellow oil. **<sup>1</sup>H NMR (400 MHz, CDCl<sub>3</sub>, δ, ppm, J/Hz):** 0.79 (3H, s, Me-9), 0.84 (3H, s, Me-10), 0.87 (3H, s, Me-8), 0.94 (1H, dd, <sup>2</sup>J=13.9, J<sub>2endo,1endo</sub>=3.5, H-2endo), 1.15-1.31 (2H, m, H-4endo, H-5exo), 1.62-1.77 (2H, m, H-3, H-4exo), 1.86 (1H, m, H-5endo), 2.33 (1H, m, H-2exo), 2.57 (4H, m, 2H-13, 2H-16), 3.20 (2H, s, H-12), 3.72 (4H, m, 2H-14, 2H-15), 4.90 (1H, m, H-1endo). **<sup>13</sup>C NMR (100 MHz, CDCl<sub>3</sub>, δ, ppm):** 169.97 s (C-11), 79.89 d (C-1), 66.35 t (C-14, C-15), 59.25 t (C-12), 52.76 t (C-13, C-16), 48.32 s (C-6), 47.37 s (C-7), 44.39 d (C-3), 36.33 t (C-2), 27.56 t (C-4), 26.67 t (C-5), 19.24 q (Me-9), 18.37 q (Me-10), 13.10 q (Me-8). [ $\alpha$ ]<sub>D</sub><sup>28</sup> = -23.8 (CHCl<sub>3</sub>, c=0.68). HRMS: calcd for C<sub>16</sub>H<sub>27</sub>NO<sub>3</sub>: 281.1985; found: 281.1985.

**(1S,2S,4S)-1,7,7-trimethylbicyclo[2.2.1]heptan-2-yl 3-morpholinopropanoate (26)**

Compound **26** was prepared similarly to compound **16**. Yield: 49%, pale yellow oil. **<sup>1</sup>H NMR (400 MHz, CDCl<sub>3</sub>, δ, ppm, J/Hz):** 0.79 (3H, s, Me-9), 0.83 (3H, s, Me-10), 0.86 (3H, s, Me-8), 0.94 (1H, dd, <sup>2</sup>J=13.7, J<sub>2endo,1endo</sub>=3.5, H-2endo), 1.13-1.30 (2H, m, H-4endo, H-5exo), 1.63 (1H, dd, J<sub>3,2exo</sub>=J<sub>3,4exo</sub>=4.6, H-3), 1.71 (1H, m, H-4exo), 1.87 (1H, m, H-5endo), 2.30 (1H,

m, H-2exo), 2.39-2.45 (4H, m, 2H-14, 2H-17), 2.45-2.49 (2H, m, H-12), 2.59-2.68 (2H, m, H-13), 3.53-3.73 (4H, m, 2H-15, 2H-16), 4.86 (1H, m, H-1exo). <sup>13</sup>C NMR (125 MHz, CDCl<sub>3</sub>, δ, ppm): 172.5 s (C-11), 79.7 d (C-1), 66.7 t (C-15, C-16), 53.9 t (C-13), 53.1 t (C-14, C-17), 48.6 s (C-6), 47.6 s (C-7), 44.6 d (C-3), 36.5 t (C-2), 32.3 t (C-12), 27.8 t (C-4), 26.9 t (C-5), 19.5 q (Me-9), 18.6 q (Me-10), 13.3 q (Me-8).  $[\alpha]_D^{28} = -27$  (CHCl<sub>3</sub>, c=0.7). HRMS: calcd for C<sub>17</sub>H<sub>29</sub>O<sub>3</sub>N: **295.2142**; found: **295.2140**.

## 1.6 Biological studies

Each compound was tested for its toxicity against MDCK cells and for virus-inhibiting activity as described previously<sup>2</sup>. Briefly, compounds were dissolved in 0.1 mL DMSO, and 0.9 mL of MEM medium was added. Then three-fold dilutions of compounds starting from 0.3 mg/mL were prepared and applied to an MDCK cell monolayer. Cell viability was further evaluated by MTT test.<sup>3</sup> To assess antiviral activity, cells were infected with either rimantadine-resistant, oseltamivir-sensitive influenza virus A/Puerto/Rico/8/34 (H1N1) in the presence of three-fold dilutions of compounds. Virus titer was further measured by TCID<sub>50</sub> titration. Based on the data obtained, the 50% cytotoxic concentration (concentration resulting in the death of 50% of cells, CC<sub>50</sub>), 50% inhibition concentration (concentration resulting in a decrease of virus titer by 50%, IC<sub>50</sub>) and selectivity index (SI, ratio of CC<sub>50</sub> to IC<sub>50</sub>) were calculated.

NMR <sup>1</sup>H and <sup>13</sup>C spectra of the compounds **4-21**

# Compound 4

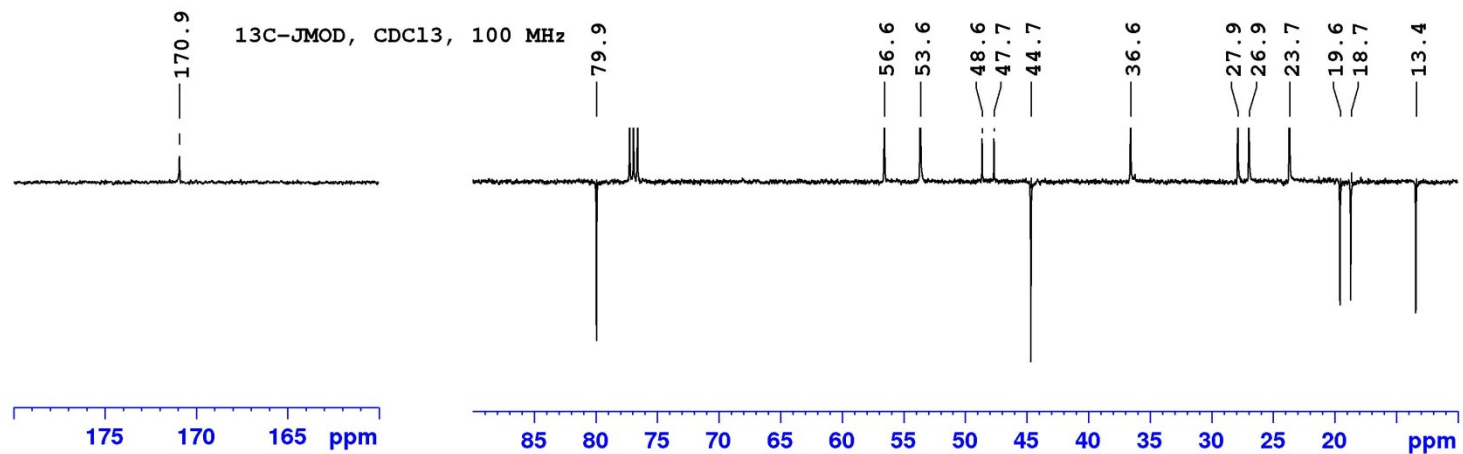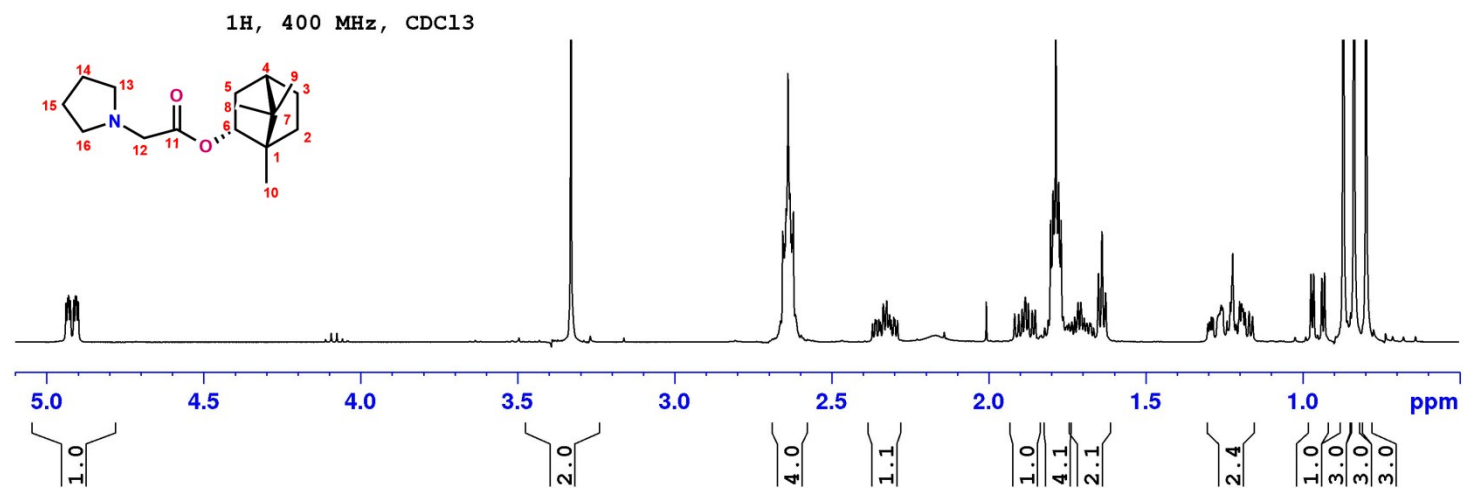

# Compound 5

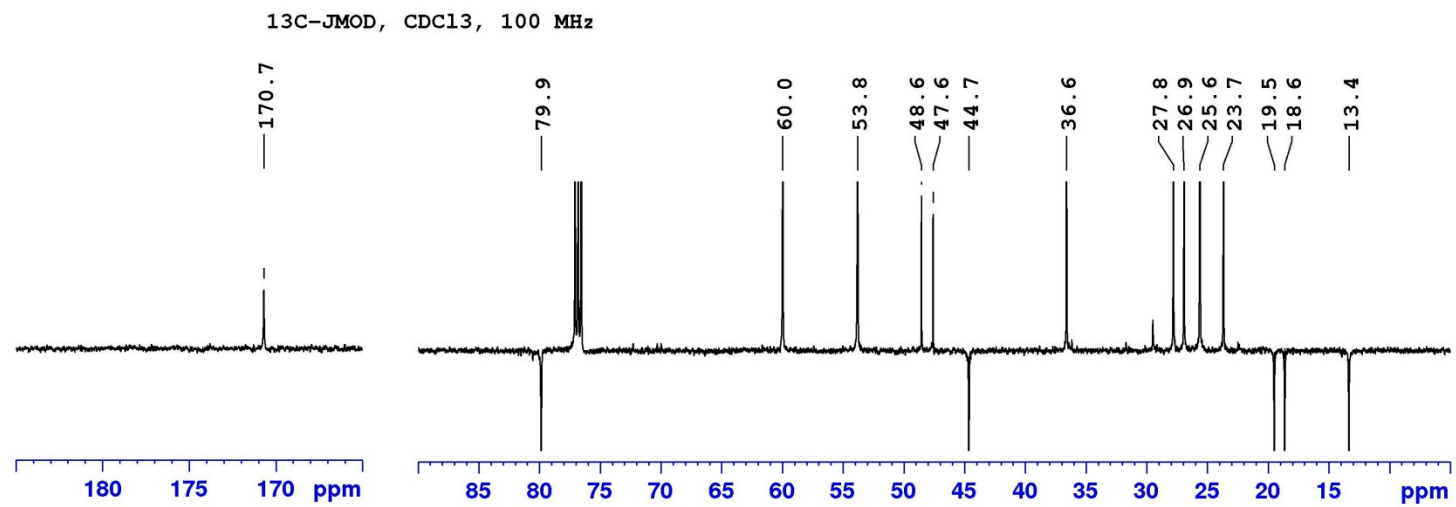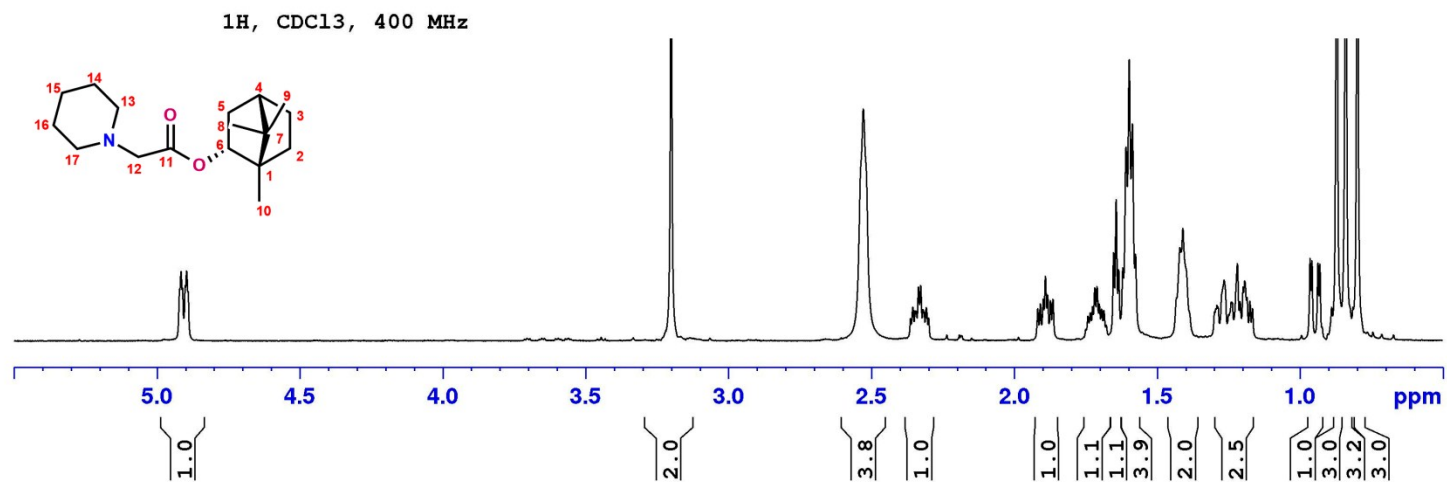

# Compound 6

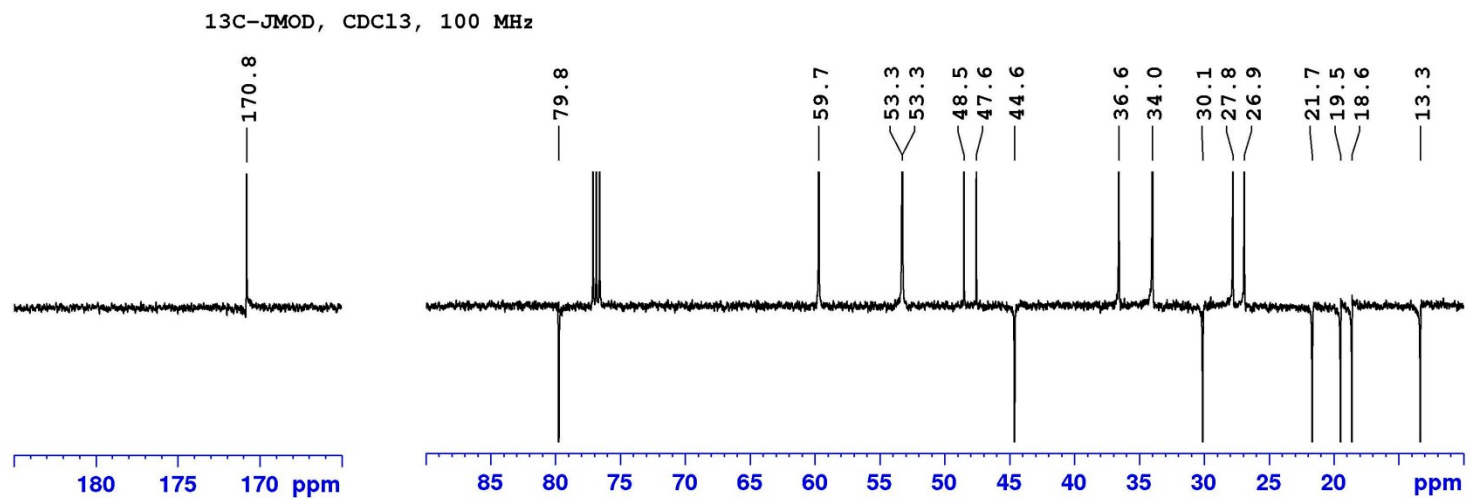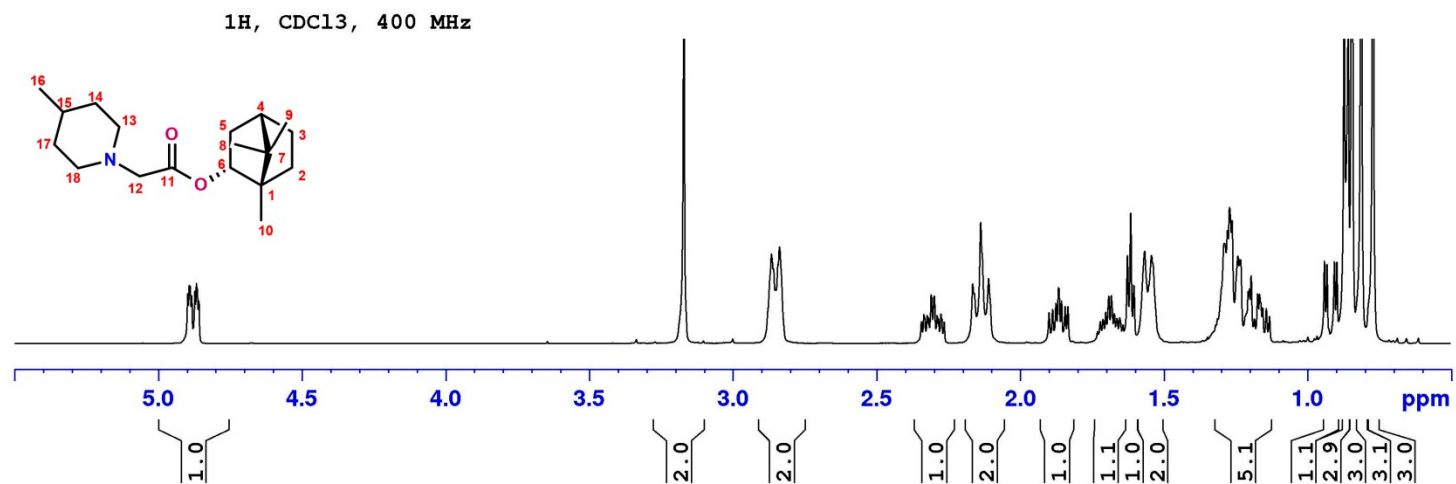

# Compound 7

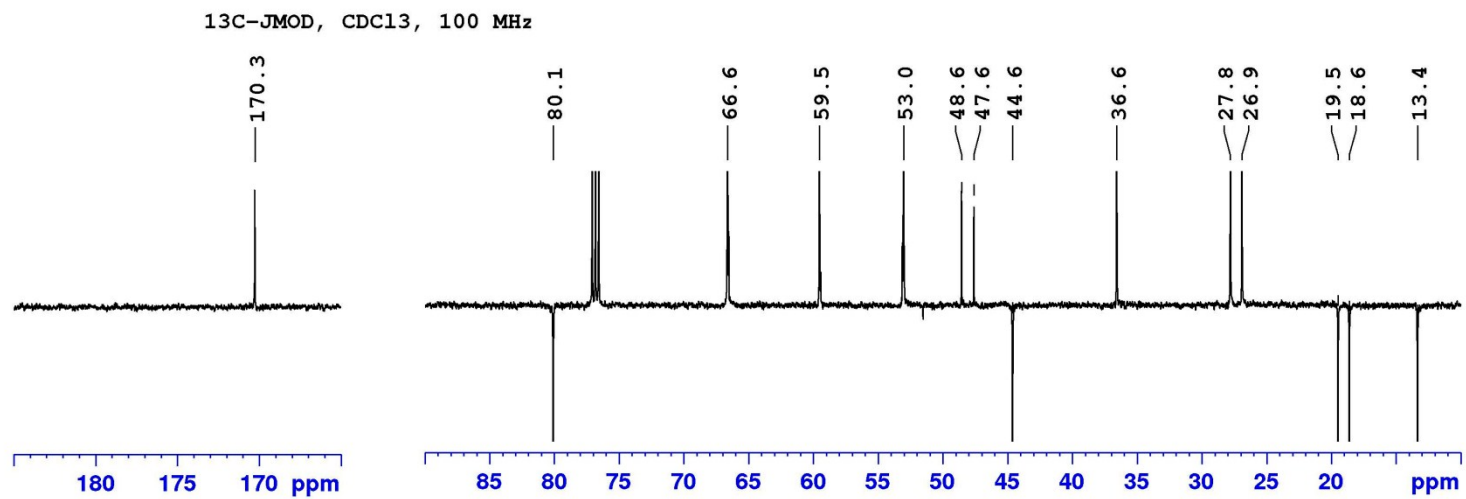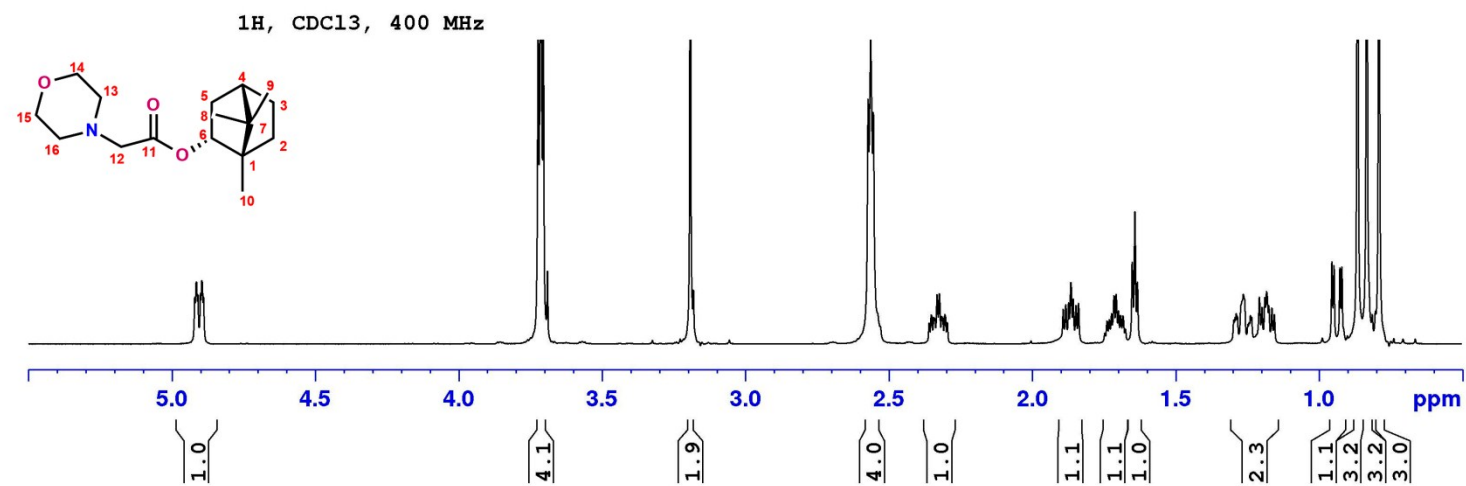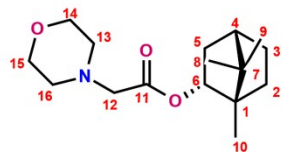

# Compound 8

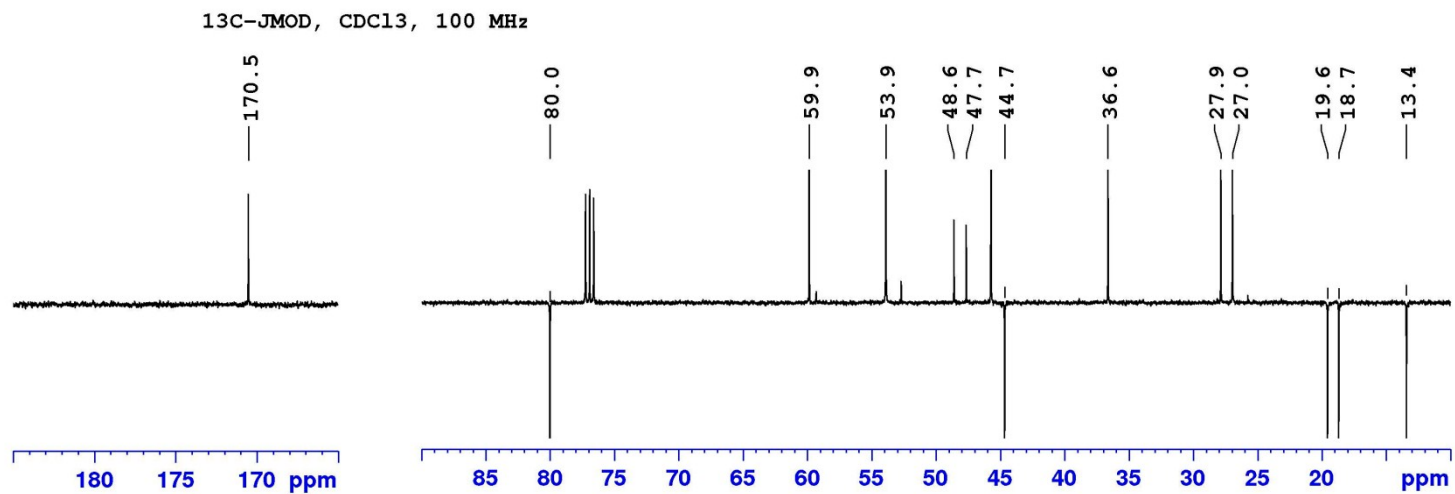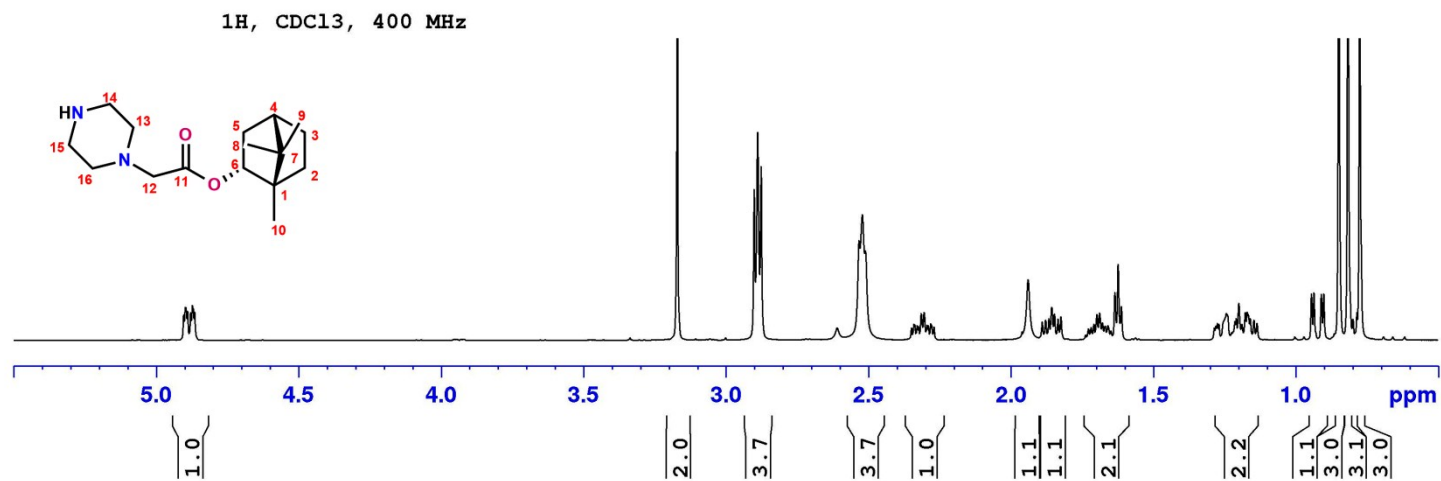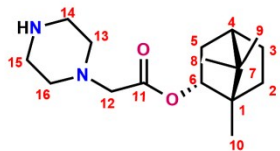



# Compound 9

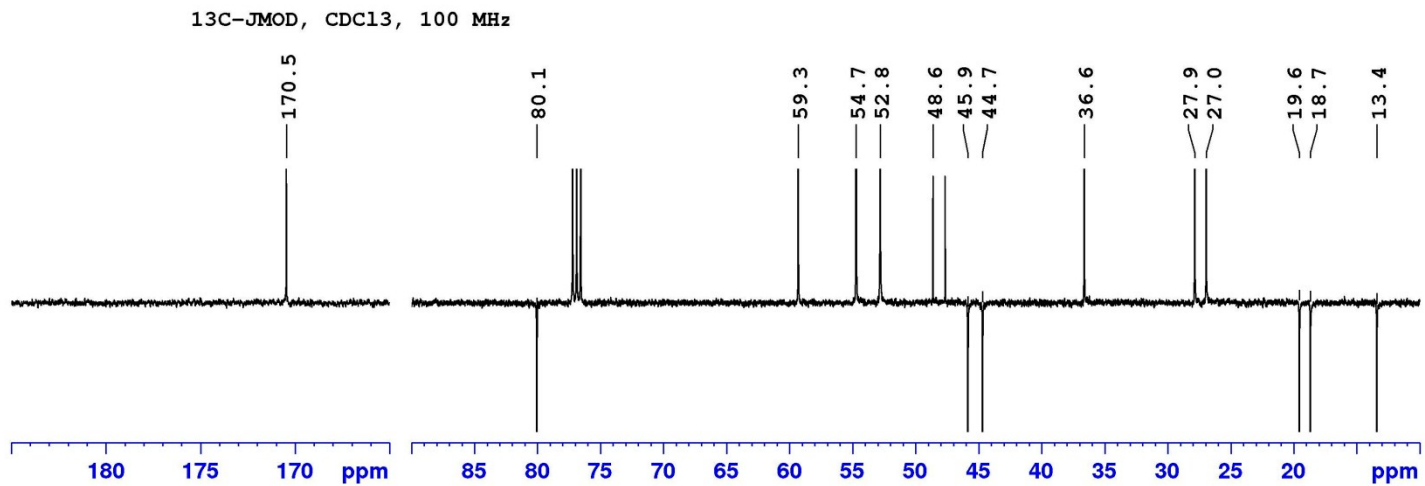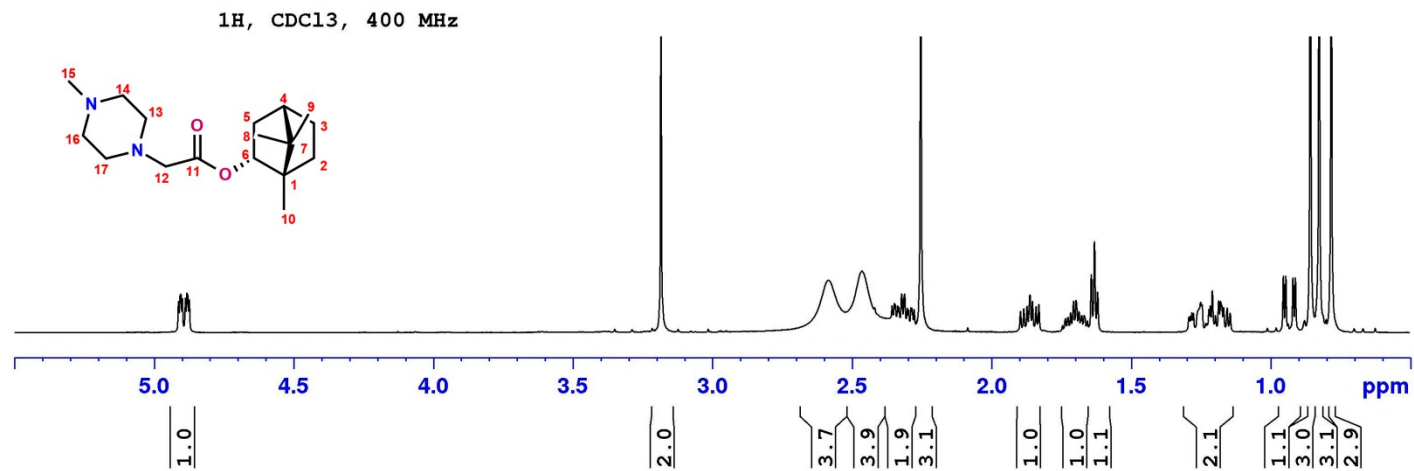

# Compound 10

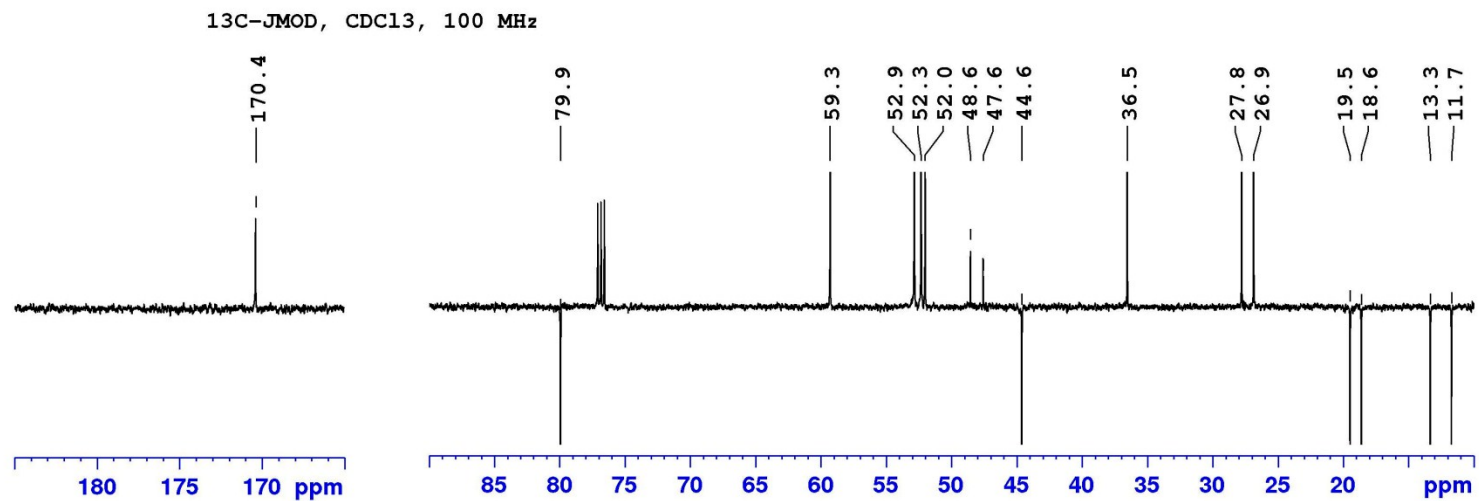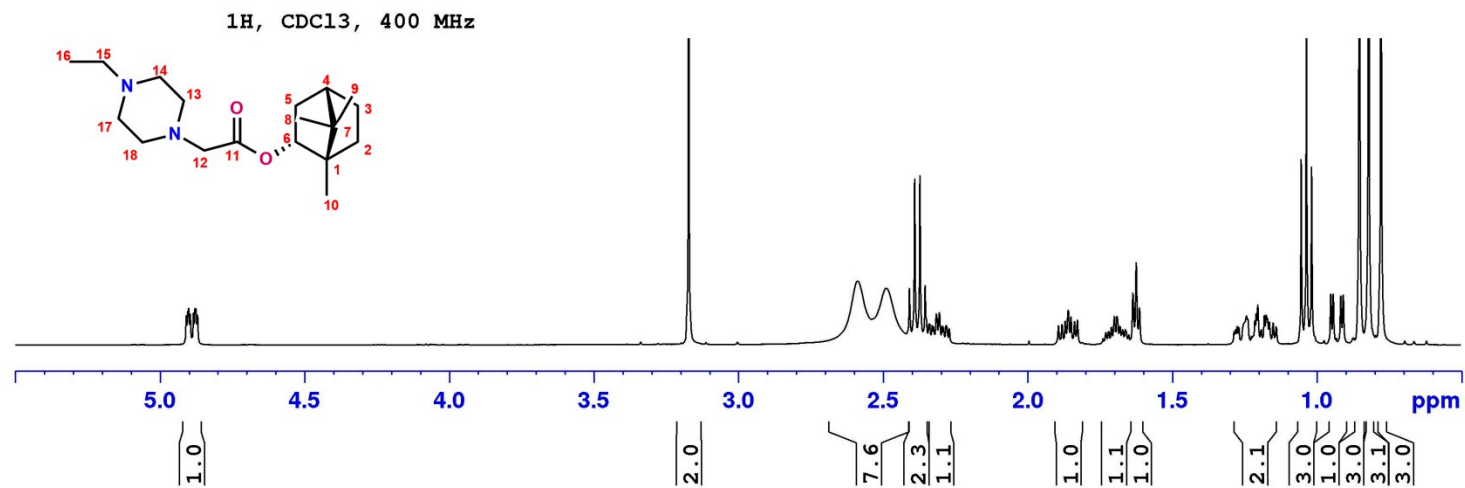

# Compound 11

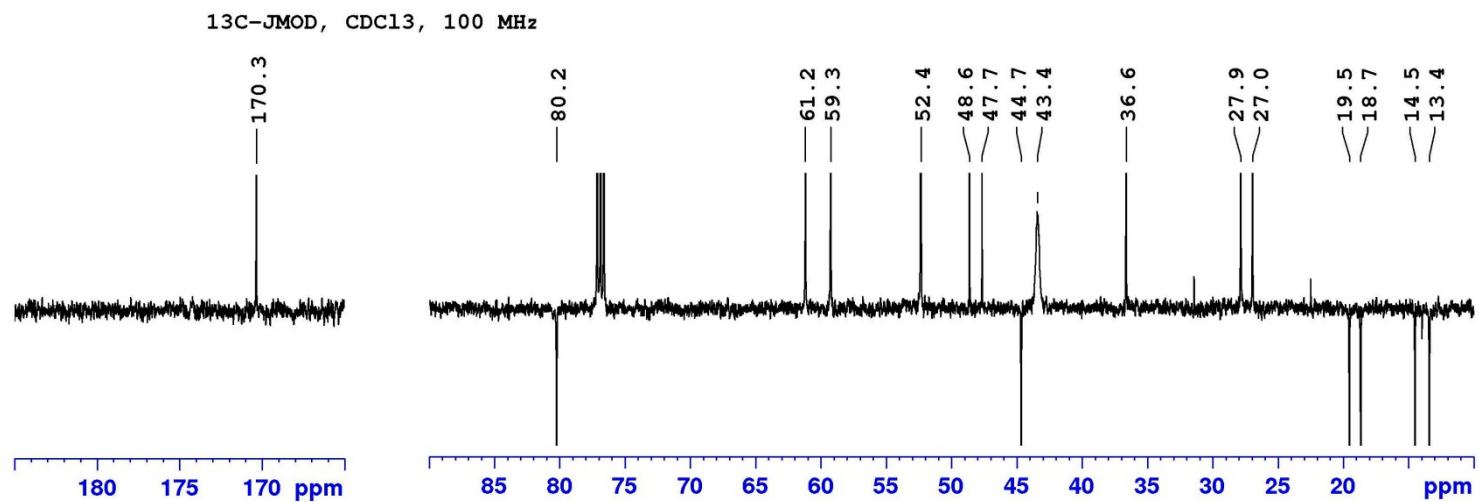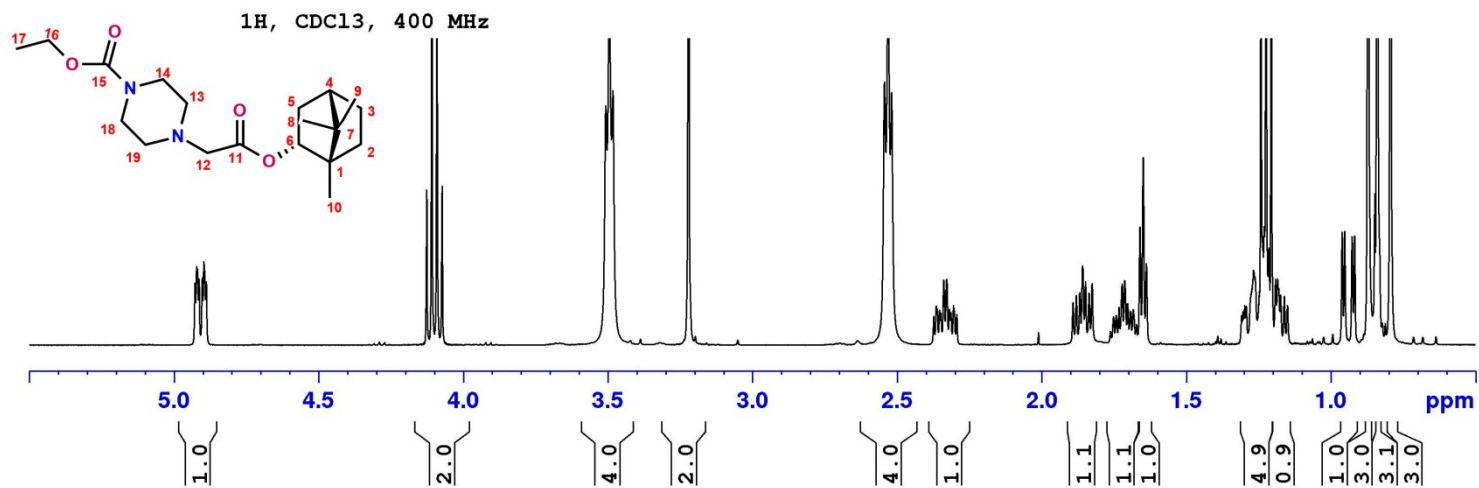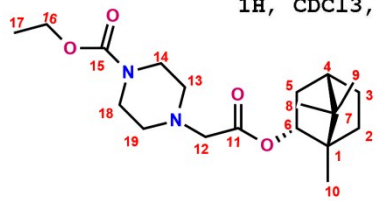

# Compound 12

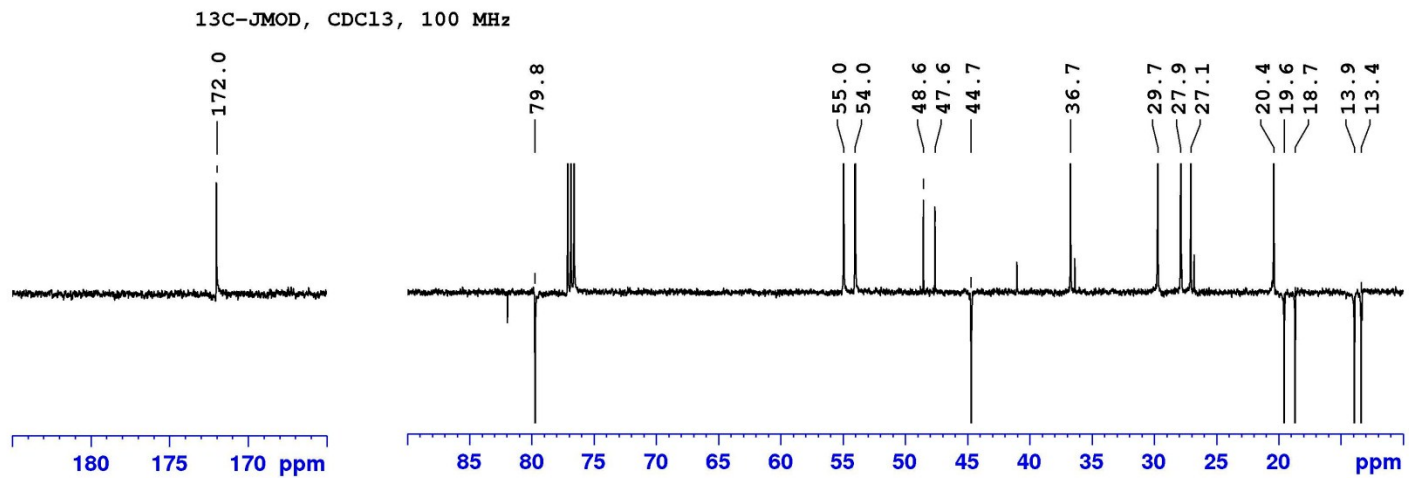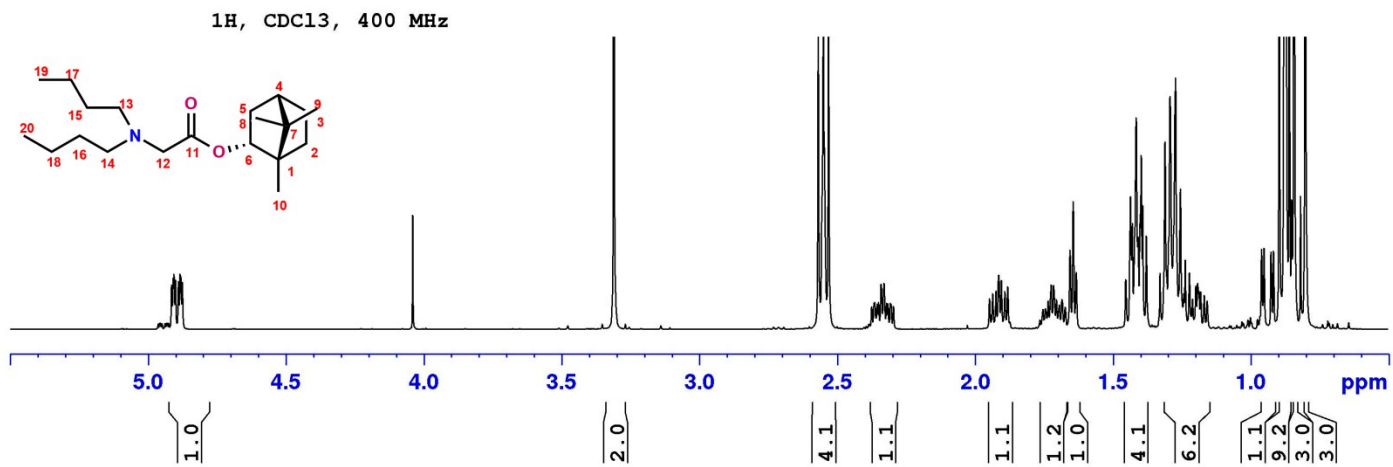

# Compound 13

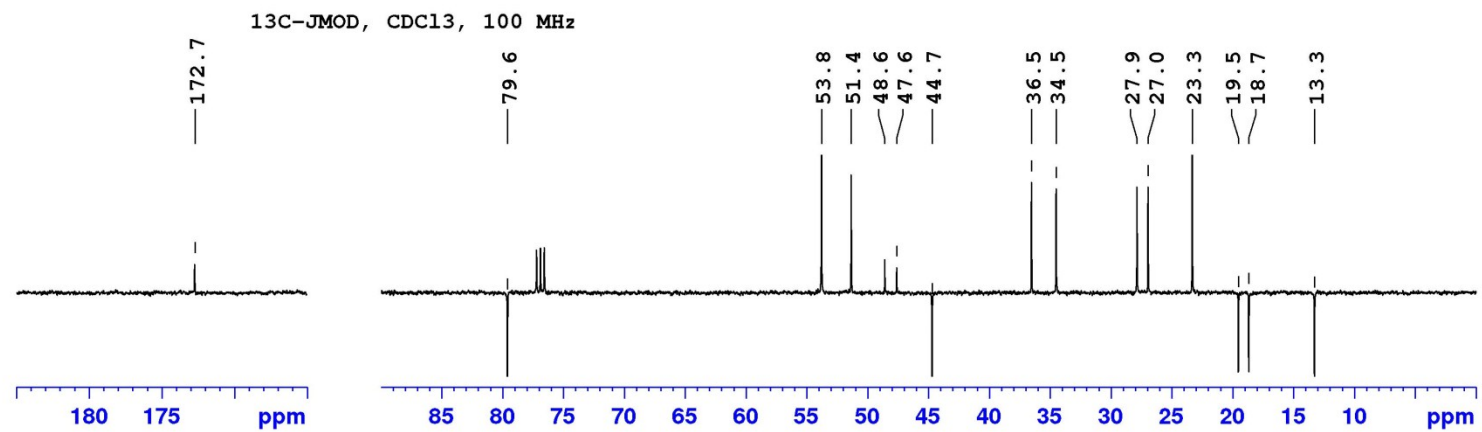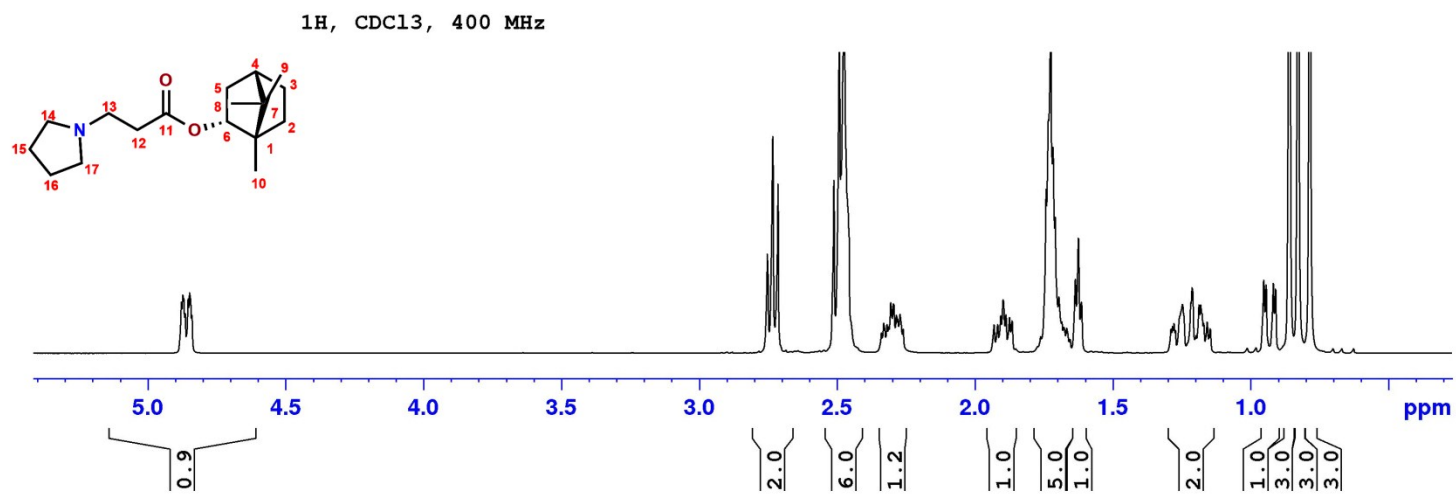

# Compound 14

$^{13}\text{C}$ -JMOD,  $\text{CDCl}_3$ , 100 MHz

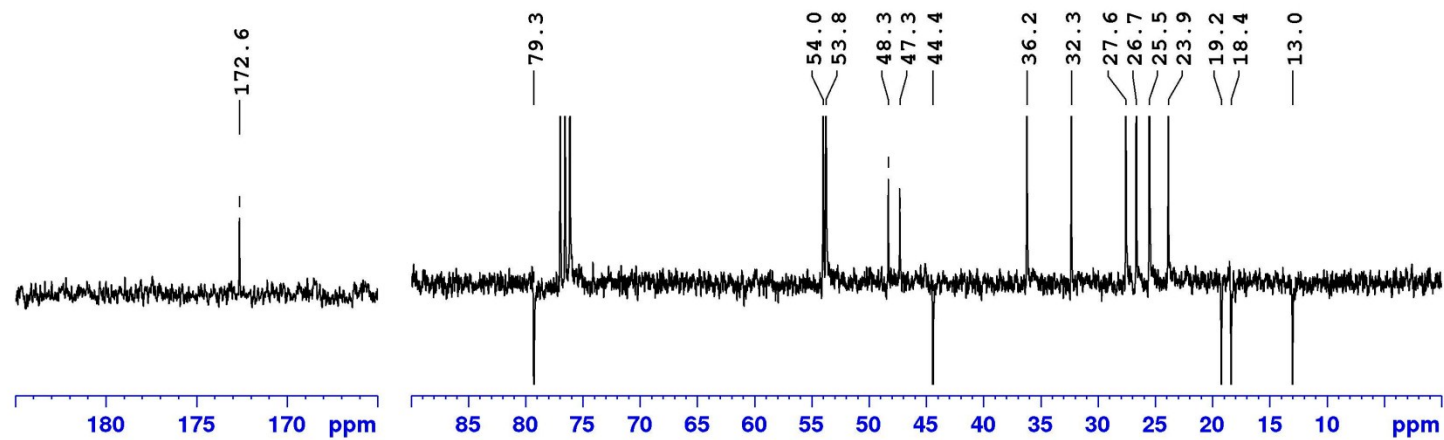

$^1\text{H}$ ,  $\text{CDCl}_3$ , 400 MHz

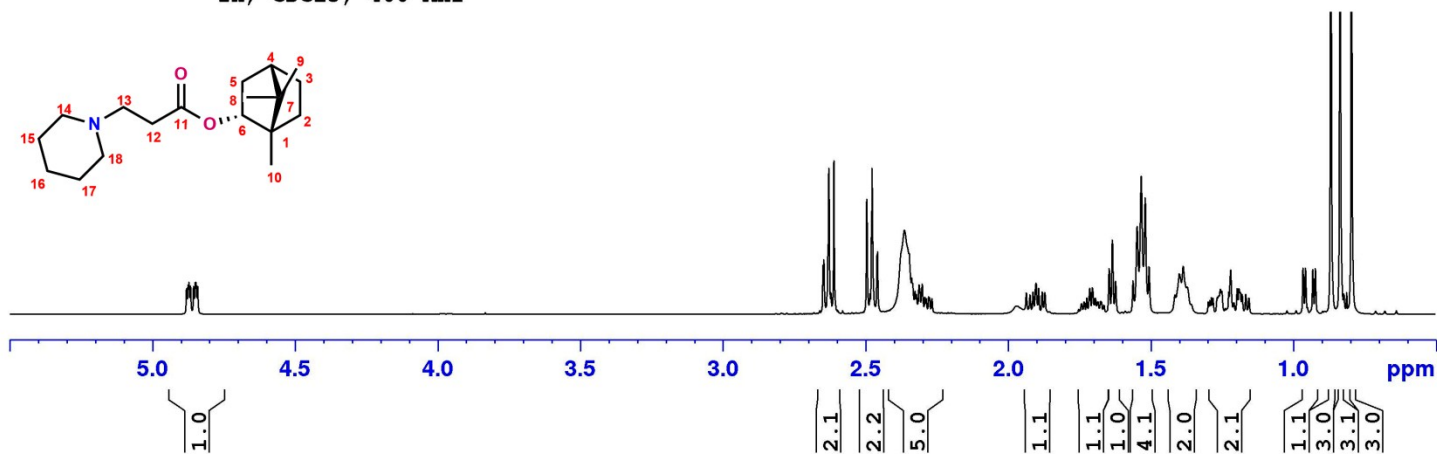

# Compound 15

<sup>13</sup>C-JMOD, CDC13, 100 MHz

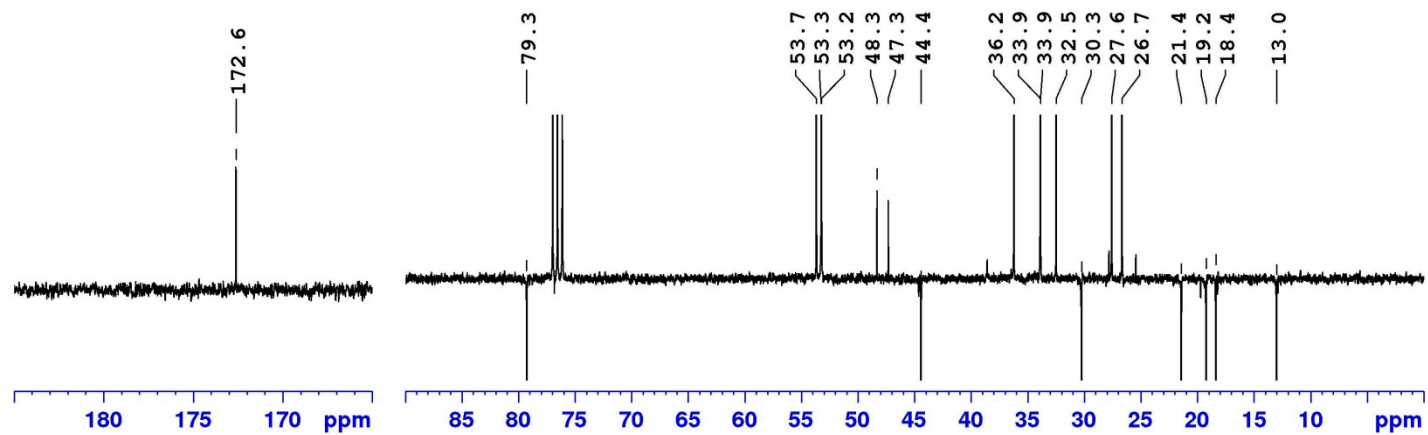

<sup>1</sup>H, CDC13, 400 MHz

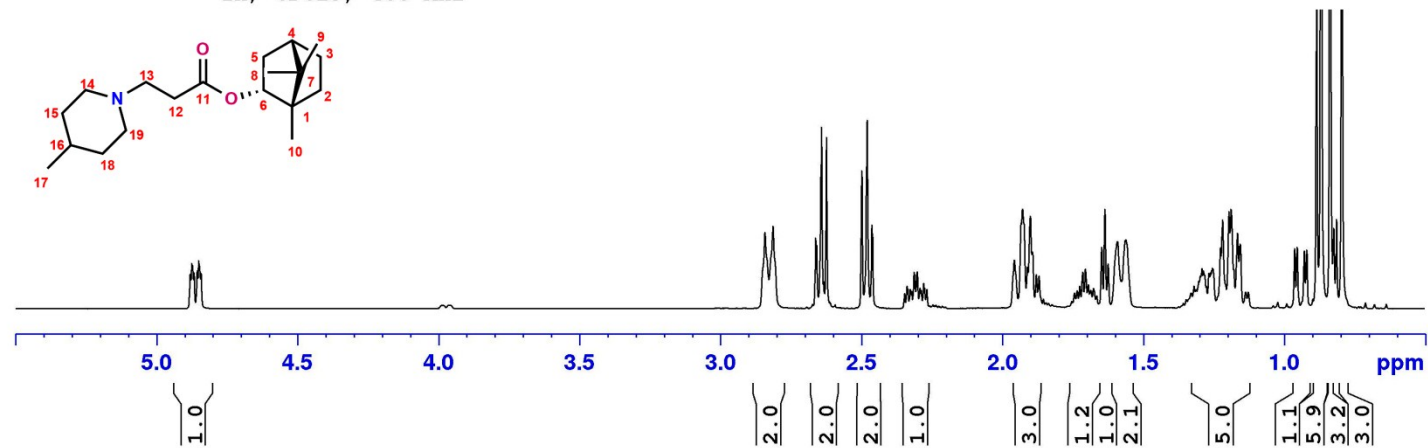

# Compound 16

$^{13}\text{C}$ -JMOD,  $\text{CDCl}_3$ , 100 MHz

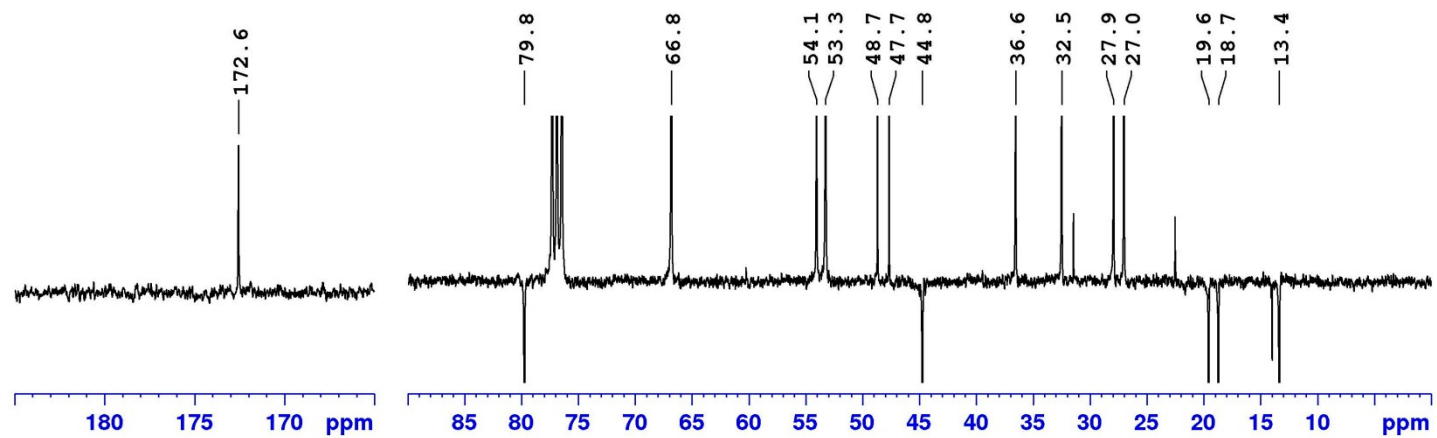

$^1\text{H}$ ,  $\text{CDCl}_3$ , 400 MHz

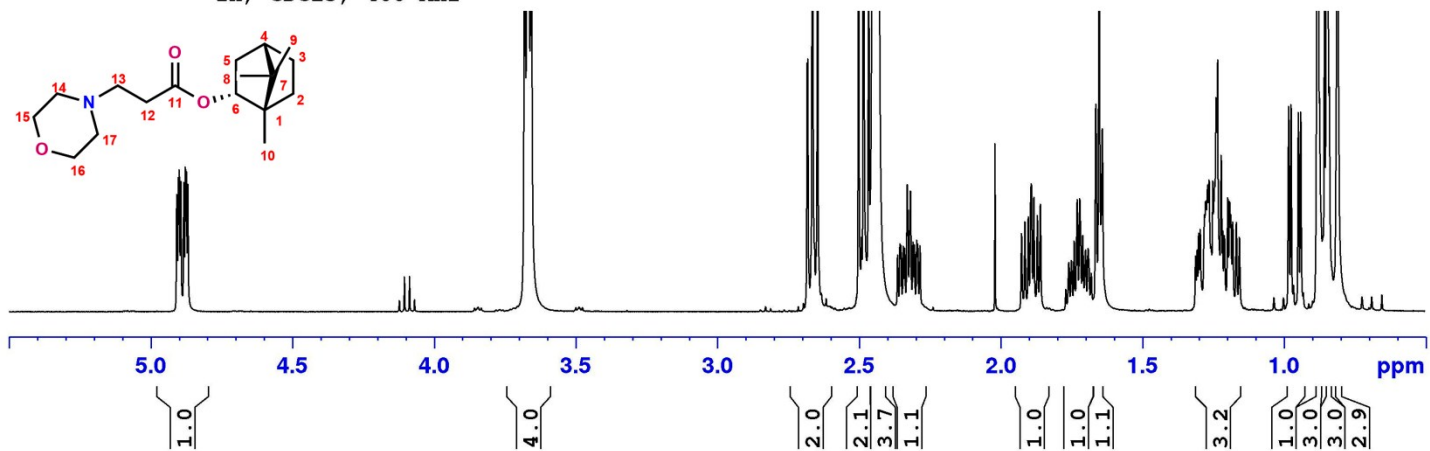



# Compound 17

<sup>13</sup>C-JMOD, CDCl<sub>3</sub>, 100 MHz

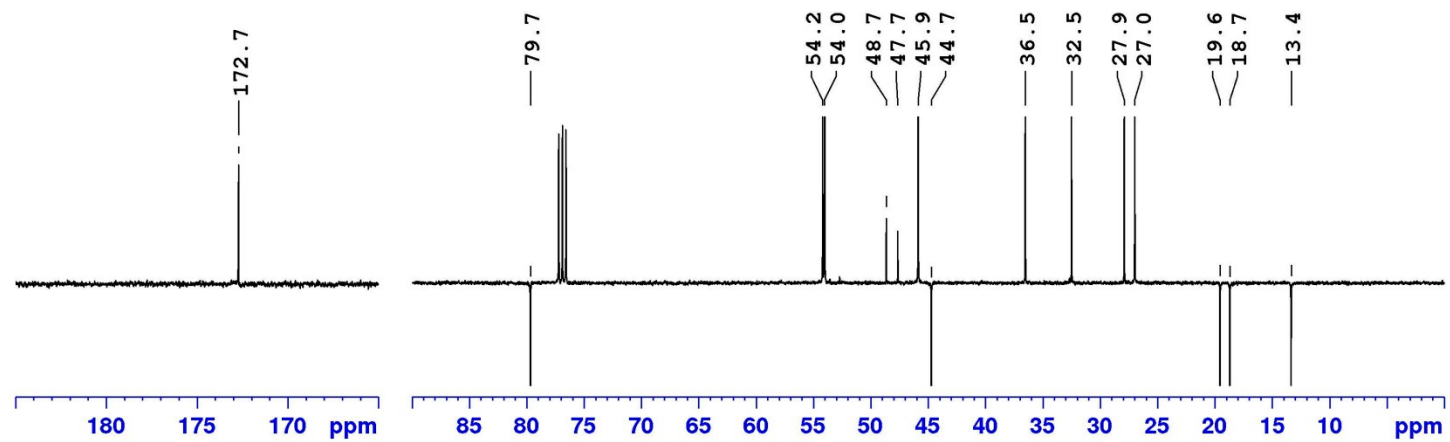

<sup>1</sup>H, CDCl<sub>3</sub>, 400 MHz

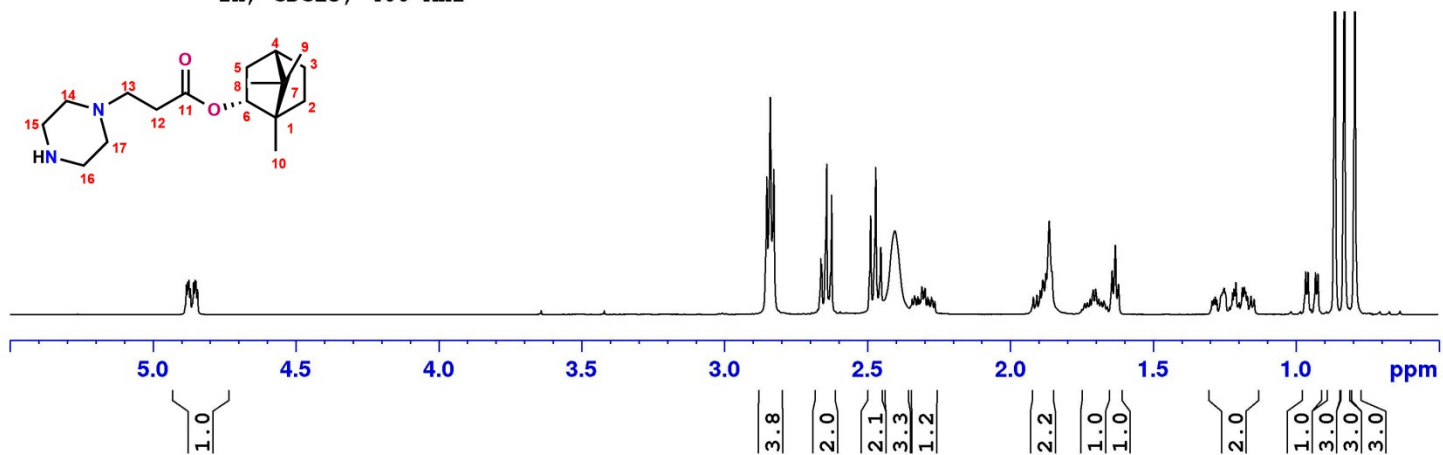

# Compound 18

<sup>13</sup>C-JMOD, CDC13, 100 MHz

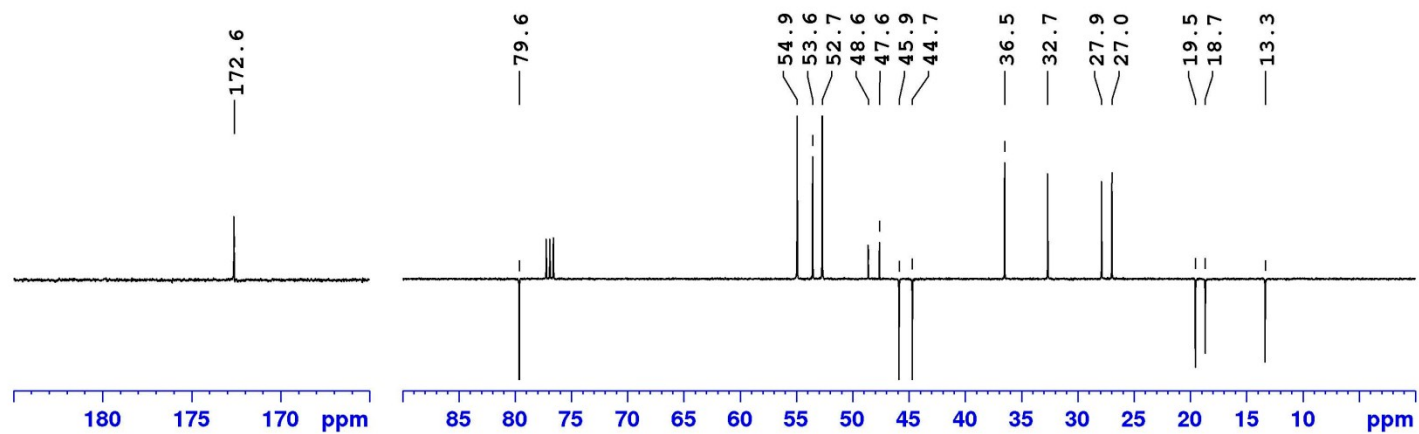

<sup>1</sup>H, CDC13, 400 MHz

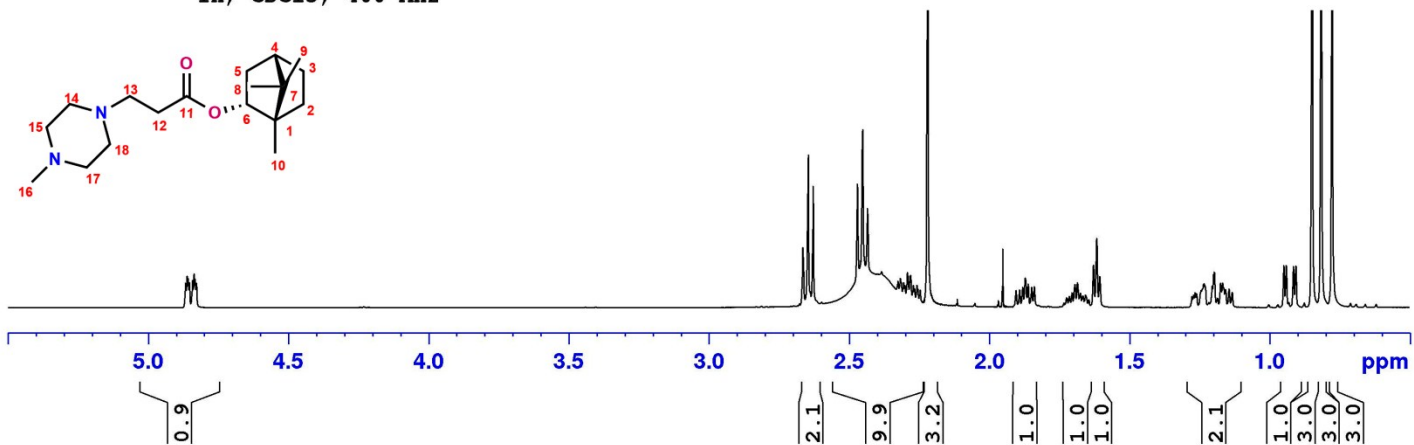

# Compound 19

$^{13}\text{C}$ -JMOD,  $\text{CDCl}_3$ , 100 MHz

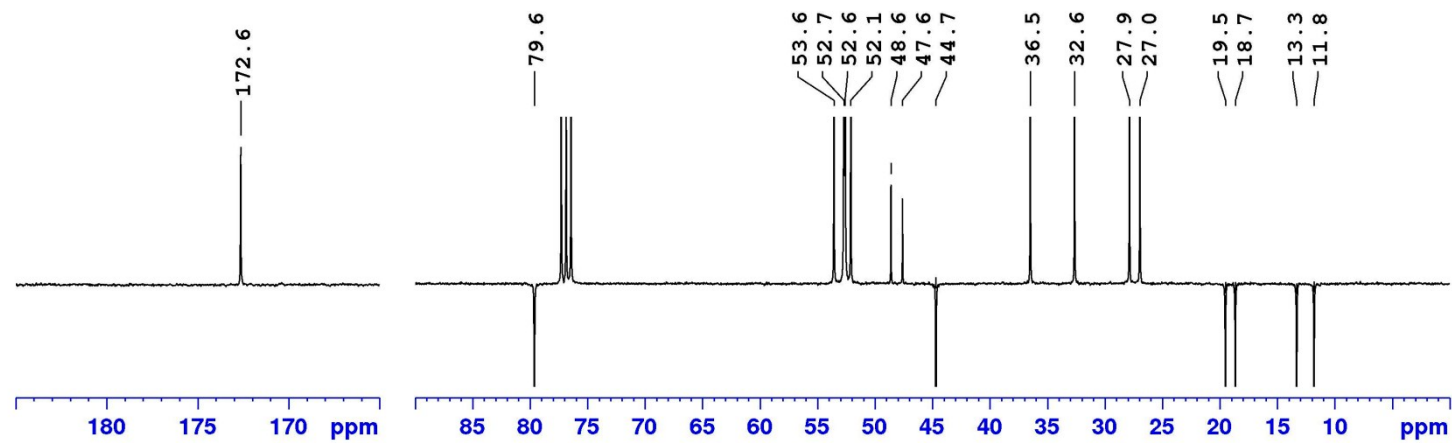

$^1\text{H}$ ,  $\text{CDCl}_3$ , 400 MHz

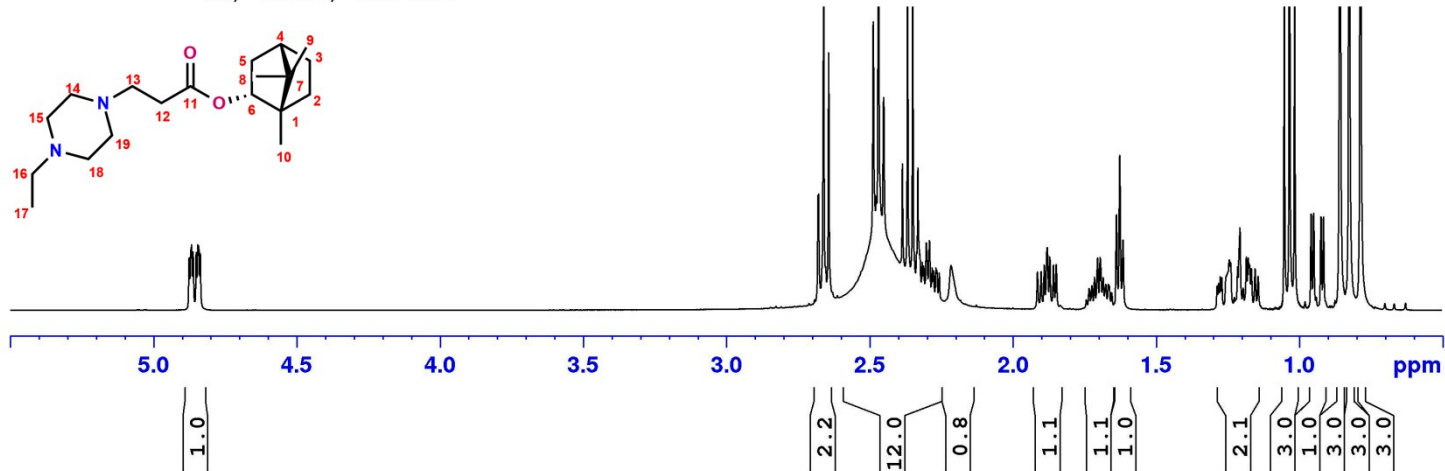

# Compound 20

<sup>13</sup>C-JMOD, CDC13, 100 MHz

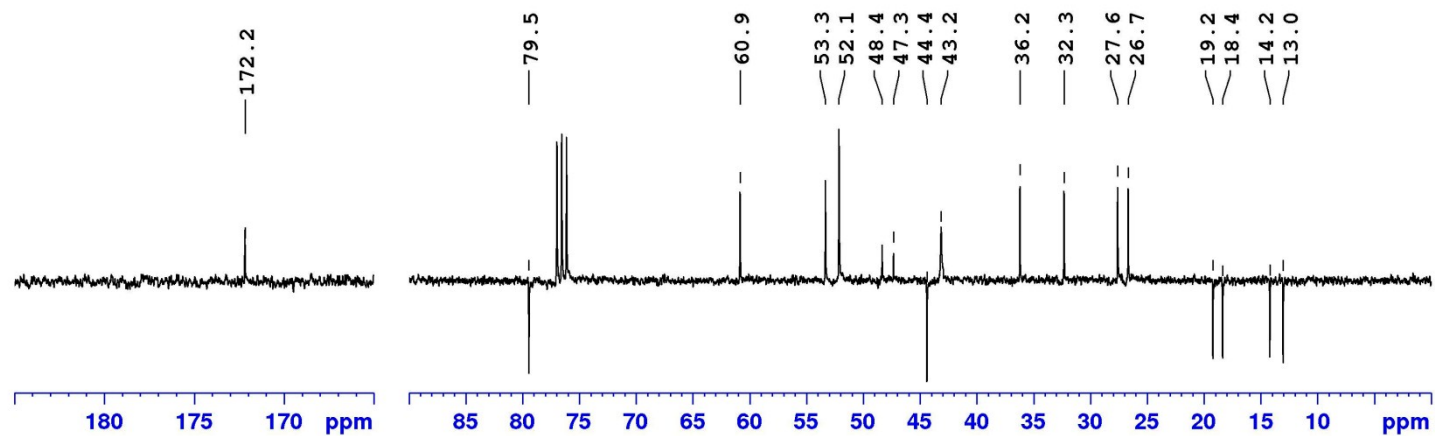

<sup>1</sup>H, CDC13, 400 MHz

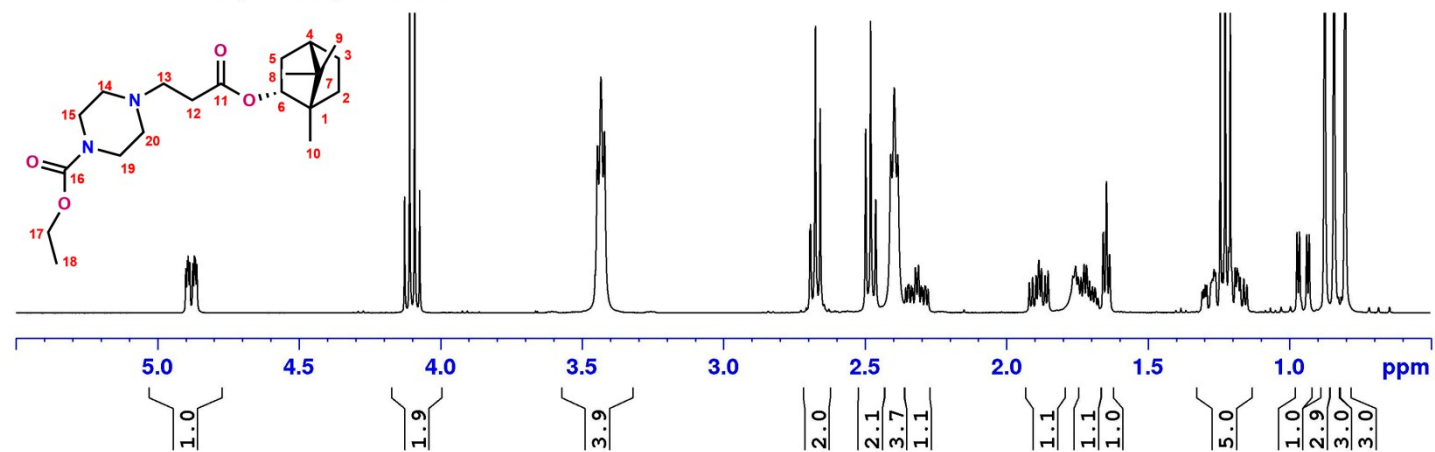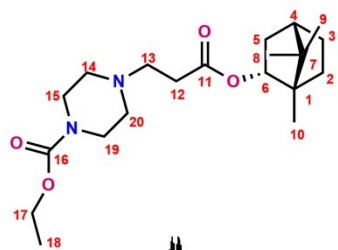

# Compound 21

<sup>13</sup>C-JMOD, CDCl<sub>3</sub>, 100 MHz

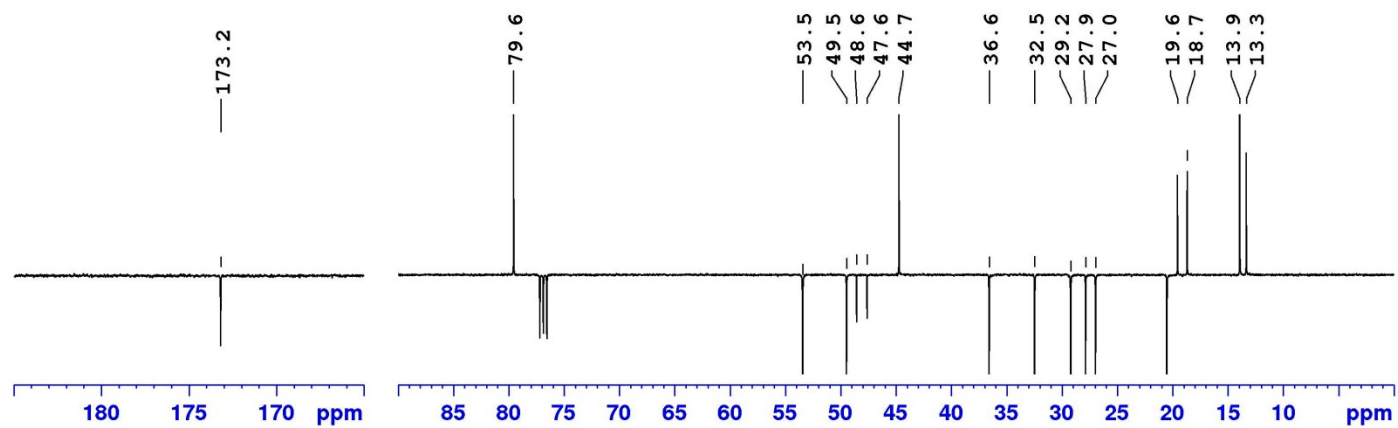

<sup>1</sup>H, CDCl<sub>3</sub>, 400 MHz

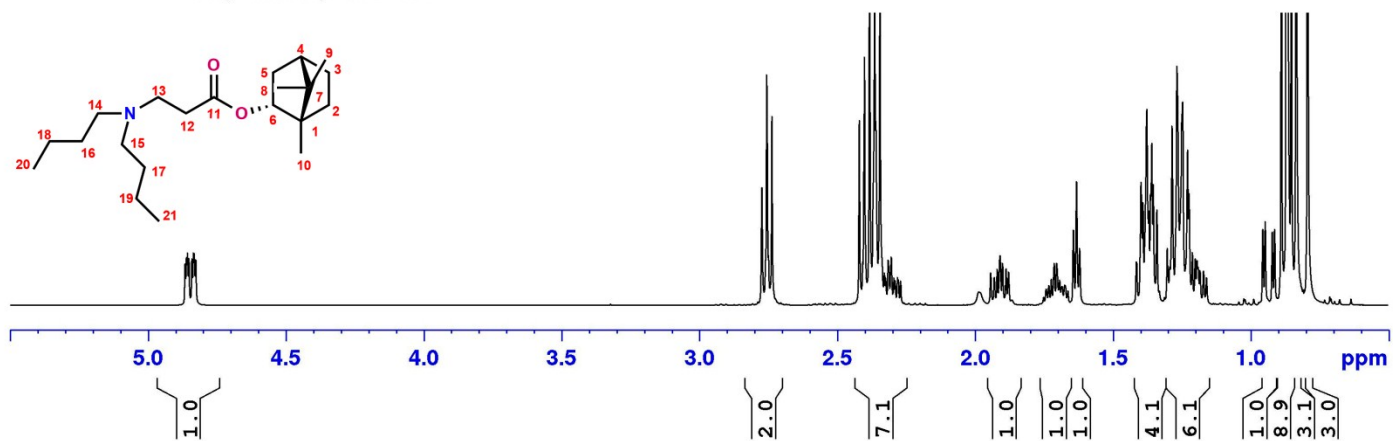

# Compound 26

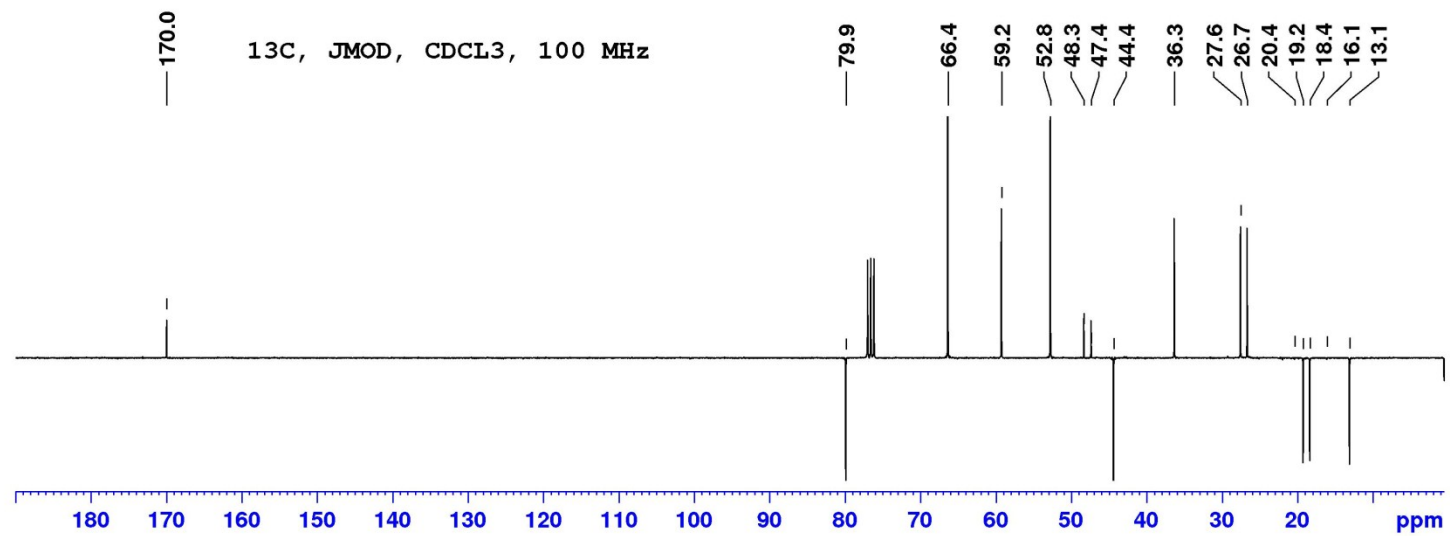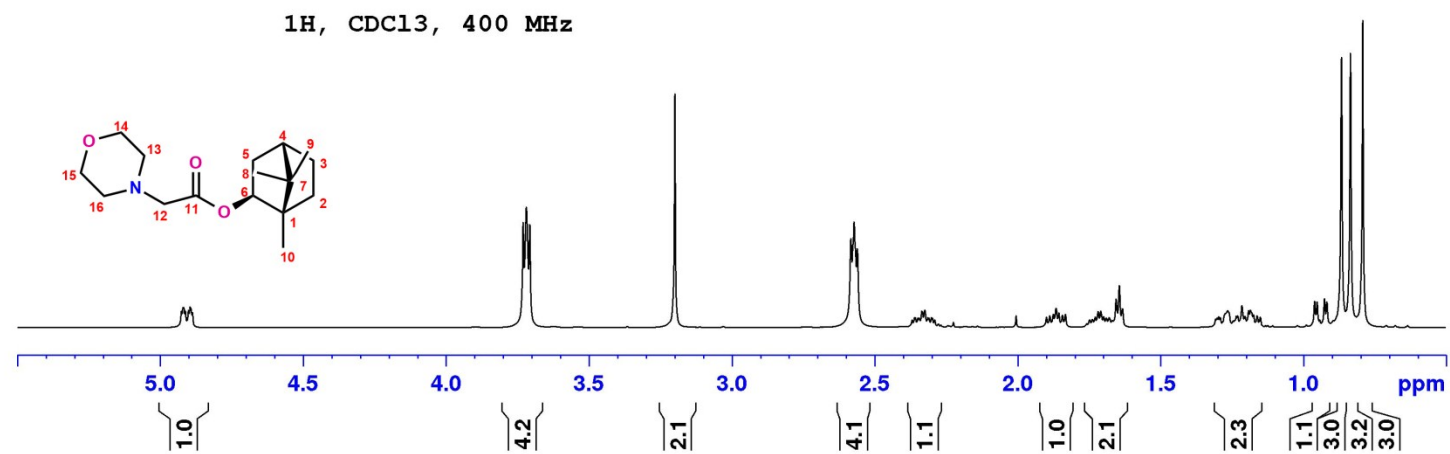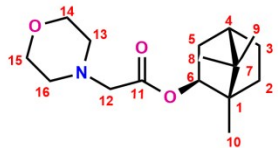

Compound 27

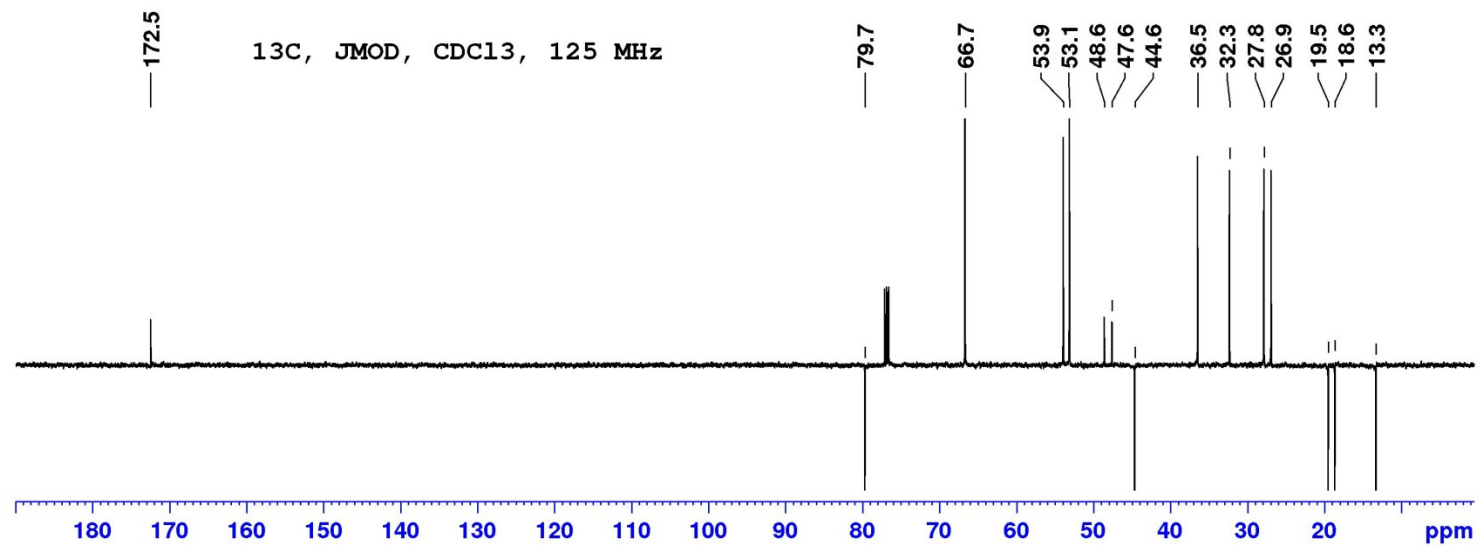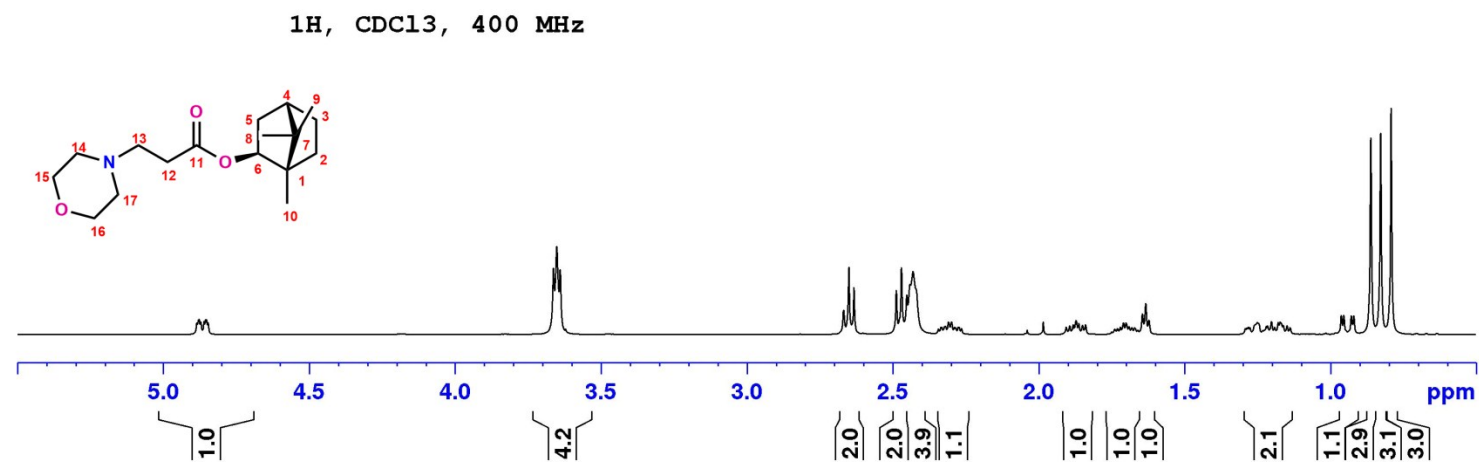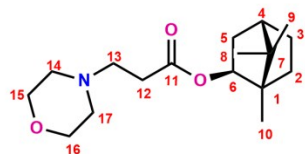

---

<sup>1</sup> H. Dentel, I. Chataigner, J. Lohier, M. Gulea, *Tetrahedron*, 2012, **68**, 2326.

<sup>2</sup> A. S. Sokolova, O. I. Yarovaya, A. V. Shernyukov, Yu. V. Gatilov, Yu. V. Razumova, V. V. Zarubaev, T. S. Tretiak, A. G. Pokrovsky, O. I. Kiselev, N. F. Salakhutdinov, *Eur. J. Med. Chem.*, 2015, **105**, 263.

<sup>3</sup> T. Mosmann, *J. Immunol. Methods* 1983, **65**, 55.
